# Supplementary material for: Visible-light-induced N-alkylation of anilines with 4-hydroxybutan-2-one
Source: Royal Society of Chemistry journal article supplement (doi:10.1039/d4ra01339e), 2024-01-01

Supporting Information for

**Visible-light-induced N-Alkylation of Anilines with  
4-Hydroxybutan-2-one**

Liya Jiang,<sup>a</sup> Ling Ni,<sup>b</sup> Xinyue Tang,<sup>b</sup> Jonathan B. Baell,<sup>a</sup> Fei Huang,<sup>a\*</sup> and Lanhui Ren<sup>b\*</sup>

<sup>a</sup>School of Pharmaceutical Sciences, Nanjing Tech University, Nanjing 211816, China.

<sup>b</sup>Institute of Zhejiang University-Quzhou, 99 Zheda Road, Quzhou, Zhejiang Province, 324000, China.

Contents:

1. UV-vis spectroscopic of **1a** and NH<sub>4</sub>Br in MeOH (page 2)
2. Reactions setup (page 2)
3. <sup>1</sup>H, <sup>13</sup>C and <sup>19</sup>F NMR Data (page 3)
4. <sup>1</sup>H, <sup>13</sup>C and <sup>19</sup>F NMR Spectra (page 7)

## 1. UV-vis spectroscopic of 1a and NH<sub>4</sub>Br in MeOH

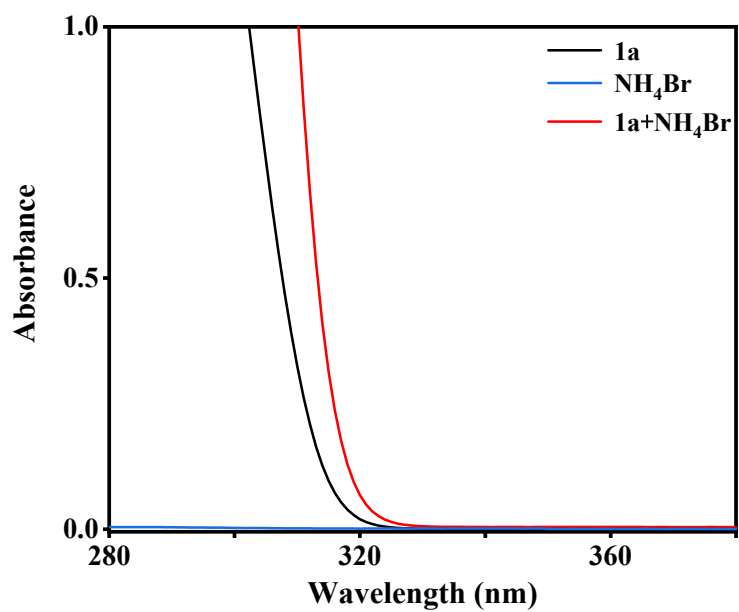

Figure S1. UV-vis spectroscopic of 1a and NH<sub>4</sub>Br in MeOH.

## 2. Reactions setup

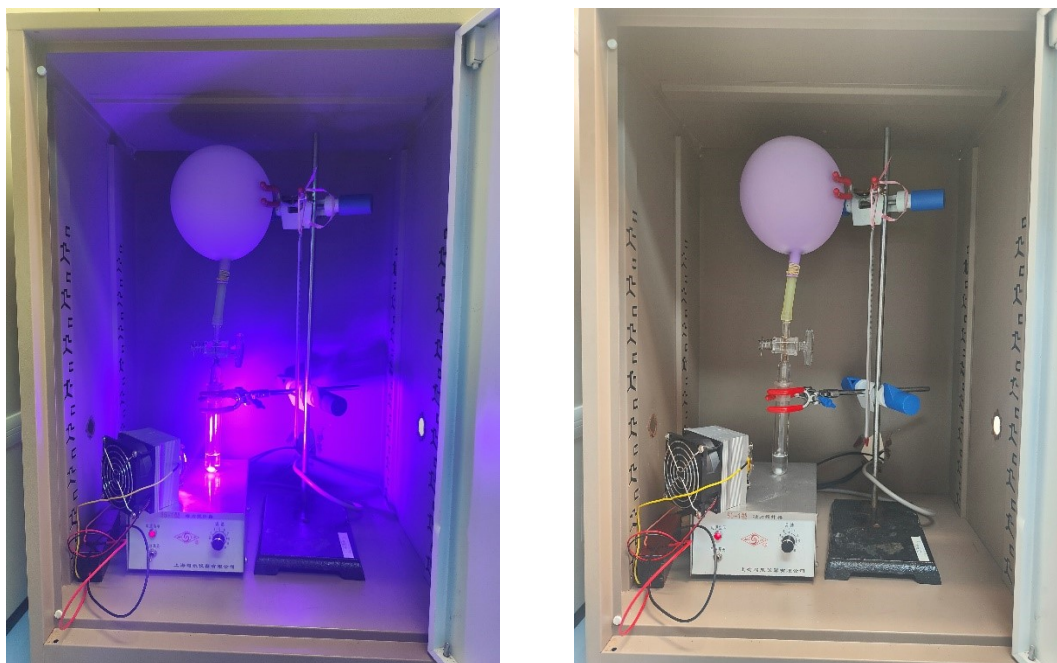

Figure S2. Reactions setup.

### 3. $^1\text{H}$ , $^{13}\text{C}$ and $^{19}\text{F}$ NMR Datas

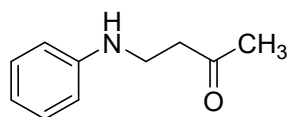

4-(Phenylamino)butan-2-one **3a**

$^1\text{H}$  NMR (500 MHz,  $\text{CDCl}_3$ )  $\delta$  7.21 - 7.16 (m, 2H), 6.72 (t,  $J = 7.3$  Hz 1H), 6.61 (d,  $J = 8.5$  Hz, 2H), 4.01 (s, 1H), 3.41 (t,  $J = 6.2$  Hz, 2H), 2.74 (t,  $J = 6.1$  Hz, 2H), 2.16 (s, 3H);  $^{13}\text{C}\{^1\text{H}\}$  NMR (126 MHz,  $\text{CDCl}_3$ )  $\delta$  208.1, 147.7, 129.3, 117.6, 113.0, 42.6, 38.3, 30.3. Known compound.<sup>1</sup>

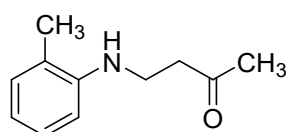

4-(O-tolylamino)butan-2-one **3b**

$^1\text{H}$  NMR (500 MHz,  $\text{CDCl}_3$ )  $\delta$  7.14 (t,  $J = 7.7$  Hz, 1H), 7.07 (d,  $J = 7.2$  Hz, 1H), 6.69 (t,  $J = 7.3$  Hz, 1H), 6.63 (d,  $J = 8.0$  Hz, 1H), 3.89 (s, 1H), 3.48 (t,  $J = 6.1$  Hz, 2H), 2.80 (t,  $J = 6.1$  Hz, 2H), 2.18 (s, 3H), 2.13 (s, 3H);  $^{13}\text{C}\{^1\text{H}\}$  NMR (126 MHz,  $\text{CDCl}_3$ )  $\delta$  208.4, 145.7, 130.3, 127.2, 122.6, 117.2, 109.6, 42.6, 38.3, 30.4, 17.5. Known compound.<sup>1</sup>

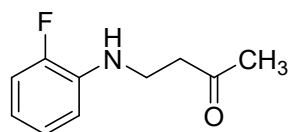

4-((2-Fluorophenyl)amino)butan-2-one **3c**

$^1\text{H}$  NMR (500 MHz,  $\text{CDCl}_3$ )  $\delta$  7.01 - 6.93 (m, 2H), 6.68 (t,  $J = 8.2$  Hz, 1H), 6.63 (dd,  $J = 7.8, 4.9$  Hz, 1H), 4.20 (dd,  $J = 18.9, 12.7$  Hz, 1H), 3.45 (t,  $J = 6.3$  Hz, 2H), 2.77 (t,  $J = 6.3$  Hz, 2H), 2.18 (s, 3H).  $^{13}\text{C}\{^1\text{H}\}$  NMR (126 MHz,  $\text{CDCl}_3$ )  $\delta$  207.7, 151.9 (d,  $J = 238.8$  Hz), 136.7, 124.7 (d,  $J = 3.5$  Hz), 117.0 (d,  $J = 7.2$  Hz), 114.7 (d,  $J = 18.4$  Hz), 112.2 (d,  $J = 3.0$  Hz), 42.8, 38.1, 30.5.  $^{19}\text{F}$  NMR (471 MHz,  $\text{CDCl}_3$ )  $\delta$  -136.1 (s). Known compound.<sup>2</sup>

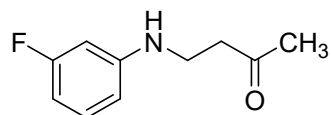

4-((3-Fluorophenyl)amino)butan-2-one **3d**

$^1\text{H}$  NMR (500 MHz,  $\text{CDCl}_3$ )  $\delta$  7.07 (td,  $J = 8.2, 6.8$  Hz, 1H), 6.39 - 6.32 (m, 2H), 6.27 (dd,  $J = 11.6, 2.3$  Hz, 1H), 4.14 (s, 1H), 3.37 (t,  $J = 6.0$  Hz, 2H), 2.72 (t,  $J = 6.0$  Hz, 2H), 2.15 (s, 3H);  $^{13}\text{C}\{^1\text{H}\}$  NMR (126 MHz,  $\text{CDCl}_3$ )  $\delta$  208.0, 164.3 (d,  $J = 242.7$  Hz), 149.6 (d,  $J = 10.8$  Hz), 130.4 (d,  $J = 10.2$  Hz), 108.9 (d,  $J = 2.4$  Hz), 104.0, 99.5, 77.1, 42.4, 38.3, 30.4.  $^{19}\text{F}$  NMR (471 MHz,  $\text{CDCl}_3$ )  $\delta$  -112.8 (s). Known compound.<sup>1</sup>

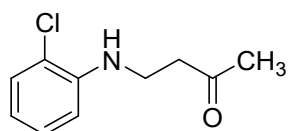

4-((2-Chlorophenyl)amino)butan-2-one **3e**

$^1\text{H}$  NMR (500 MHz,  $\text{CDCl}_3$ )  $\delta$  7.24 (dd,  $J = 7.9, 1.5$  Hz, 1H), 7.13 (m, 1H), 6.69 - 6.59 (m, 2H), 4.56 (d,  $J = 6.8$  Hz, 1H), 3.45 (t,  $J = 6.4$  Hz, 2H), 2.76 (t,  $J = 6.4$  Hz, 2H), 2.16 (s, 3H).  $^{13}\text{C}\{^1\text{H}\}$  NMR (126 MHz,  $\text{CDCl}_3$ )  $\delta$  206.9, 143.0, 128.7, 127.2, 118.9, 116.8, 110.5, 42.0, 37.5, 29.7. Known compound.<sup>1</sup>

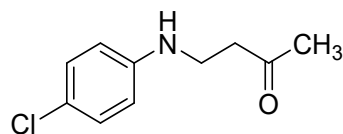

4-((4-Chlorophenyl)amino)butan-2-one **3f**

$^1\text{H}$  NMR (500 MHz,  $\text{CDCl}_3$ )  $\delta$  7.10 (d,  $J = 8.9$  Hz, 2H), 6.51 (d,  $J = 8.9$  Hz, 2H), 4.02 (s, 1H), 3.36 (s, 2H), 2.72 (s, 2H), 2.16 (s, 3H).  $^{13}\text{C}\{^1\text{H}\}$  NMR (126 MHz,  $\text{CDCl}_3$ )  $\delta$  207.8, 146.0, 128.9, 121.8, 113.8, 42.1, 38.2, 30.1. Known compound.<sup>1</sup>

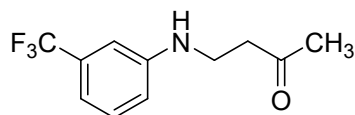

4-((3-(Trifluoromethyl)phenyl)amino)butan-2-one **3g**

$^1\text{H}$  NMR (500 MHz,  $\text{CDCl}_3$ )  $\delta$  7.24 (t,  $J = 7.9$  Hz, 1H), 6.93 (d,  $J = 7.6$  Hz, 1H), 6.78 (s, 1H), 6.73 (dd,  $J = 8.2, 2.0$  Hz, 1H), 4.17 (s, 1H), 3.42 (t,  $J = 6.0$  Hz, 2H), 2.75 (t,  $J = 6.0$  Hz, 2H), 2.17 (s, 3H).  $^{13}\text{C}$  NMR (126 MHz,  $\text{CDCl}_3$ )  $\delta$  207.9, 148.0, 131.7, 129.8, 124.4 (q,  $J = 272.7$  Hz), 116.1, 114.0 (d,  $J = 3.8$  Hz), 108.9 (d,  $J = 4.0$  Hz), 42.3, 38.1, 30.3.  $^{19}\text{F}$  NMR (471 MHz,  $\text{CDCl}_3$ )  $\delta$  -62.8. Known compound.<sup>1</sup>

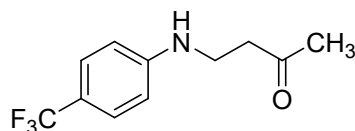

4-((4-(Trifluoromethyl)phenyl)amino)butan-2-one **3h**

$^1\text{H}$  NMR (500 MHz,  $\text{CDCl}_3$ )  $\delta$  7.39 (d,  $J = 8.4$  Hz, 2H), 6.59 (d,  $J = 8.5$  Hz, 2H), 4.38 (s, 1H), 3.44 (t,  $J = 6.0$  Hz, 2H), 2.75 (t,  $J = 6.0$  Hz, 2H), 2.17 (s, 3H).  $^{13}\text{C}\{^1\text{H}\}$  NMR (126 MHz,  $\text{CDCl}_3$ )  $\delta$  207.8, 150.2, 126.7 (q,  $J = 3.7$  Hz), 125.1 (q,  $J = 262.7$  Hz), 119.1 (q,  $J = 32.5$  Hz) 112.0, 42.3, 37.9, 30.4.  $^{19}\text{F}$  NMR (471 MHz,  $\text{CDCl}_3$ )  $\delta$  -60.9 (s). Known compound.<sup>1</sup>

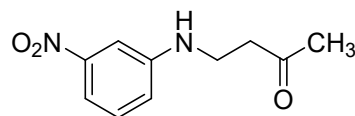

4-((3-Nitrophenyl)amino)butan-2-one **3i**

$^1\text{H}$  NMR (500 MHz,  $\text{CDCl}_3$ )  $\delta$  7.49 (dd,  $J = 8.1, 2.0$  Hz, 1H), 7.36 (s, 1H), 7.25 (t,  $J = 7.0$  Hz, 1H), 6.84 (dd,  $J = 8.2, 2.4$  Hz, 1H), 4.47 (s, 1H), 3.45 (t,  $J = 5.9$  Hz, 2H), 2.78 (t,  $J = 5.9$  Hz, 2H), 2.18 (s, 3H).  $^{13}\text{C}\{^1\text{H}\}$  NMR (126 MHz,  $\text{CDCl}_3$ )  $\delta$  208.1 (s), 149.7 (s), 148.9 (s), 130.1 (s), 119.4 (s), 112.4 (s), 106.4 (s), 42.4 (s), 38.3 (s), 30.6 (s). Known compound.<sup>1</sup>

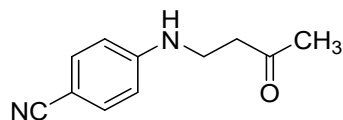

4-((3-Oxobutyl)amino)benzotrile **3j**

$^1\text{H}$  NMR (500 MHz,  $\text{CDCl}_3$ )  $\delta$  7.39 (dd,  $J = 8.8, 1.4$  Hz, 2H), 6.53 (d,  $J = 8.7$  Hz, 2H), 4.63 (s, 1H), 3.44 (dd,  $J = 8.6, 3.3$  Hz, 2H), 2.75 (t,  $J = 6.0$  Hz, 2H), 2.17 (s, 3H).  $^{13}\text{C}\{^1\text{H}\}$  NMR (126 MHz,  $\text{CDCl}_3$ )  $\delta$  207.6, 150.9, 133.8, 120.5, 112.3, 98.9, 42.2, 37.5, 30.4. Known compound.<sup>2</sup>

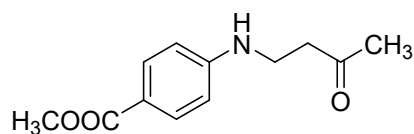

Methyl 4-((3-oxobutyl)amino)benzoate **3k**

$^1\text{H}$  NMR (500 MHz,  $\text{CDCl}_3$ )  $\delta$  7.83 (d,  $J = 8.7$  Hz, 2H), 6.52 (d,  $J = 8.7$  Hz, 2H), 4.54 (s, 1H), 3.83 (s, 3H), 3.44 (t,  $J = 6.0$  Hz, 2H), 2.74 (t,  $J = 6.0$  Hz, 2H), 2.15 (s, 3H).  $^{13}\text{C}\{^1\text{H}\}$  NMR (126 MHz,  $\text{CDCl}_3$ )  $\delta$  207.7, 167.3, 151.5, 131.6, 118.5, 111.5, 51.6, 42.4, 37.7, 30.3. Known compound.<sup>2</sup>

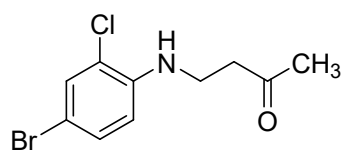

4-((4-Bromo-2-chlorophenyl)amino)butan-2-one **3l**

$^1\text{H}$  NMR (500 MHz,  $\text{CDCl}_3$ )  $\delta$  7.29 (s, 1H), 7.15 (dd,  $J = 8.7, 2.2$  Hz, 1H), 6.46 (d,  $J = 8.7$  Hz, 1H), 4.54 (s, 1H), 3.34 (t,  $J = 6.3$  Hz, 2H), 2.69 (t,  $J = 6.3$  Hz, 2H), 2.11 (s, 3H).  $^{13}\text{C}\{^1\text{H}\}$  NMR (126 MHz,  $\text{CDCl}_3$ )  $\delta$  207.0, 142.7, 131.2, 130.4, 119.8, 112.0, 107.5, 42.1, 37.9, 30.1. Known compound.<sup>2</sup>

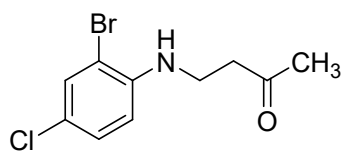

4-((2-Bromo-4-chlorophenyl)amino)butan-2-one **3m**

$^1\text{H}$  NMR (500 MHz,  $\text{CDCl}_3$ )  $\delta$  7.40 (s, 1H), 7.13 (dd,  $J = 8.7, 2.4$  Hz, 1H), 6.54 (t,  $J = 7.1$  Hz, 1H), 4.56 (s, 1H), 3.43 (t,  $J = 6.3$  Hz, 2H), 2.77 (t,  $J = 6.3$  Hz, 2H), 2.18 (s, 3H).  $^{13}\text{C}\{^1\text{H}\}$  NMR (126 MHz,  $\text{CDCl}_3$ )  $\delta$  207.3, 143.5, 132.0, 128.4, 121.8, 111.6, 110.0, 42.4, 38.4, 30.5. Known compound.<sup>2</sup>

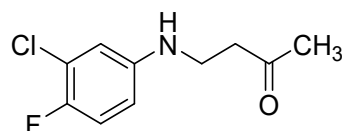

4-((3-Chloro-4-fluorophenyl)amino)butan-2-one **3n**

$^1\text{H}$  NMR (500 MHz,  $\text{CDCl}_3$ )  $\delta$  6.89 (t,  $J = 8.9$  Hz, 1H), 6.55 (dd,  $J = 6.1, 2.9$  Hz, 1H), 6.38 (ddd,  $J = 8.9, 3.6, 3.0$  Hz, 1H), 3.93 (s, 1H), 3.30 (t,  $J = 6.0$  Hz, 2H), 2.70 (t,  $J = 6.0$  Hz, 2H), 2.14 (s, 3H).  $^{13}\text{C}\{^1\text{H}\}$  NMR (126 MHz,  $\text{CDCl}_3$ )  $\delta$  208.2, 151.29 (d,  $J = 237.8$  Hz), 145.0 (d,  $J = 1.8$  Hz), 117.1 (d,  $J = 22.0$  Hz), 114.1, 112.7 (d,  $J = 6.3$  Hz), 42.5, 39.0, 30.6. Known compound.<sup>2</sup>

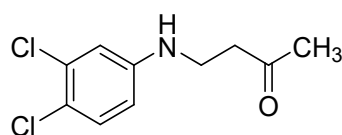

4-((3,4-Dichlorophenyl)amino)butan-2-one **3o**

$^1\text{H}$  NMR (500 MHz,  $\text{CDCl}_3$ )  $\delta$  7.16 (d,  $J = 8.7$  Hz, 1H), 6.64 (d,  $J = 2.7$  Hz, 1H), 6.41 (dd,  $J = 8.7, 2.7$  Hz, 1H), 4.12 (s, 1H), 3.35 (t,  $J = 6.0$  Hz, 2H), 2.72 (t,  $J = 6.0$  Hz, 2H), 2.16 (s, 3H).  $^{13}\text{C}\{^1\text{H}\}$  NMR (126 MHz,  $\text{CDCl}_3$ )  $\delta$  207.8, 147.3, 132.9, 130.7, 120.0, 113.9, 112.9, 42.2, 38.3, 30.4. Known compound.<sup>2</sup>

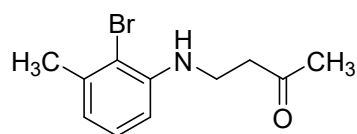

4-((2-Bromo-3-methylphenyl)amino)butan-2-one **3p**

$^1\text{H}$  NMR (500 MHz,  $\text{CDCl}_3$ )  $\delta$  7.07 (t,  $J = 7.8$  Hz, 1H), 6.61 (dd,  $J = 7.4, 0.6$  Hz, 1H), 6.50 (d,  $J = 8.0$  Hz, 1H), 4.68 (s, 1H), 3.46 (t,  $J = 6.4$  Hz, 2H), 2.77 (t,  $J = 6.4$  Hz, 2H), 2.37 (s, 3H), 2.17 (s, 3H).  $^{13}\text{C}\{^1\text{H}\}$  NMR (126 MHz,  $\text{CDCl}_3$ )  $\delta$  207.4, 144.7, 138.6, 127.6, 119.2, 112.8, 108.6, 77.4, 77.1, 76.9, 42.6, 38.5, 30.36, 23.83. Known compound.<sup>2</sup>

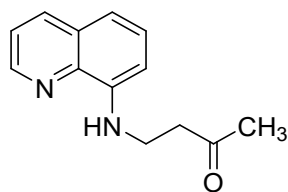

4-(Quinolin-8-ylamino)butan-2-one **3q**

$^1\text{H}$  NMR (500 MHz,  $\text{CDCl}_3$ )  $\delta$  8.70 (dd,  $J = 4.2, 1.7$  Hz, 1H), 8.05 (dd,  $J = 8.3, 1.7$  Hz, 1H), 7.38 (t,  $J = 6.2$  Hz, 1H), 7.36 (dd,  $J = 6.6, 2.3$  Hz, 1H), 7.06 (dd,  $J = 8.2, 0.9$  Hz, 1H), 6.70 (d,  $J = 7.0$  Hz, 1H), 3.63 (t,  $J = 6.7$  Hz, 2H), 2.90 (t,  $J = 6.7$  Hz, 2H), 2.20 (s, 3H).  $^{13}\text{C}\{^1\text{H}\}$  NMR (126 MHz,  $\text{CDCl}_3$ )  $\delta$  207.6, 147.0, 144.4, 138.3, 136.1, 128.8, 127.8, 121.5, 114.2, 104.7, 42.9, 38.0, 30.5. Known compound.<sup>2</sup>

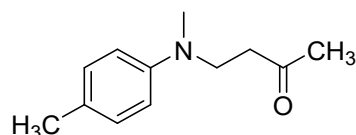

4-(Methyl(p-tolyl)amino)butan-2-one **3r**

$^1\text{H}$  NMR (500 MHz,  $\text{CDCl}_3$ )  $\delta$  7.06 (d,  $J = 8.2$  Hz, 2H), 6.65 (d,  $J = 8.6$  Hz, 2H), 3.65 (m, 2H), 2.89 (s, 3H), 2.69 (t,  $J = 7.1$  Hz, 2H), 2.26 (s, 3H), 2.15 (s, 3H).  $^{13}\text{C}\{^1\text{H}\}$  NMR (126 MHz,  $\text{CDCl}_3$ )  $\delta$  208.6, 146.9, 130.2, 130.1, 126.5, 113.4, 112.9, 48.0, 40.4, 39.0, 31.0, 20.6. Known compound.<sup>2</sup>

## References

1. G. S. Kumar, D. Singh, M. Kumar and M. Kapur, *J Org Chem* 2018, **83**, 3941-3951.
2. C. Miao, L. Jiang, L. Ren, Q. Xue, F. Yan, W. Shi, X. Li, J. Sheng and S. Kai, *Tetrahedron* 2019, **75**, 2215-2228.

## 4. $^1\text{H}$ , $^{13}\text{C}$ and $^{19}\text{F}$ NMR Spectras

### Compound 3a-1H NMR(500 MHz,CDCI3)

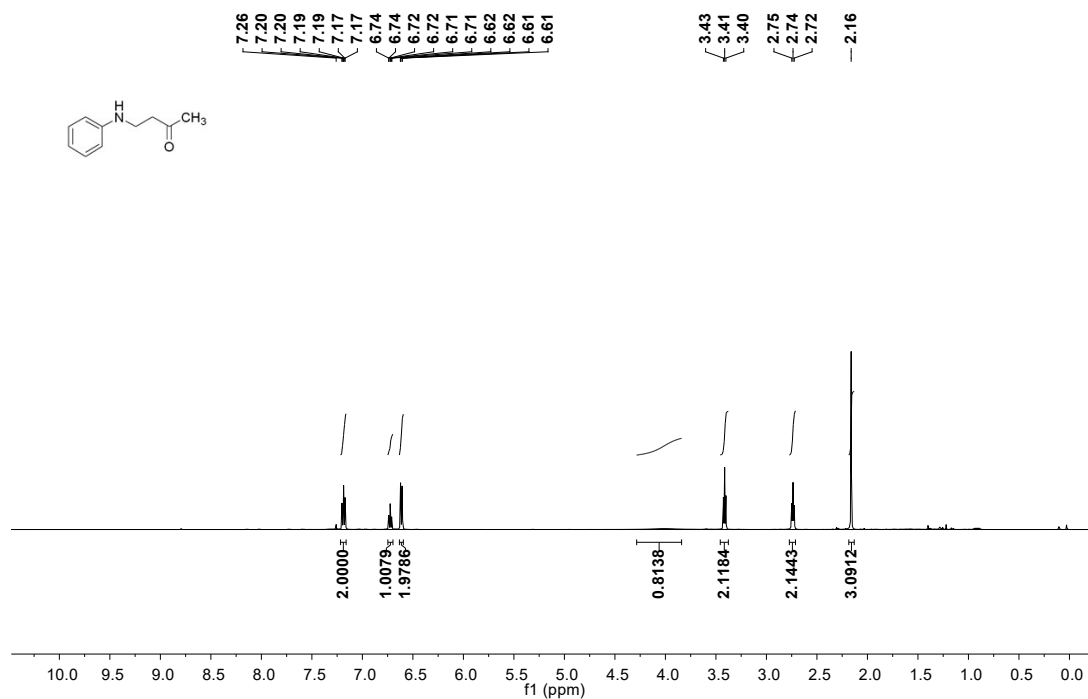

### Compound 3a-13C{1H} NMR(126MHz,CDCI3)

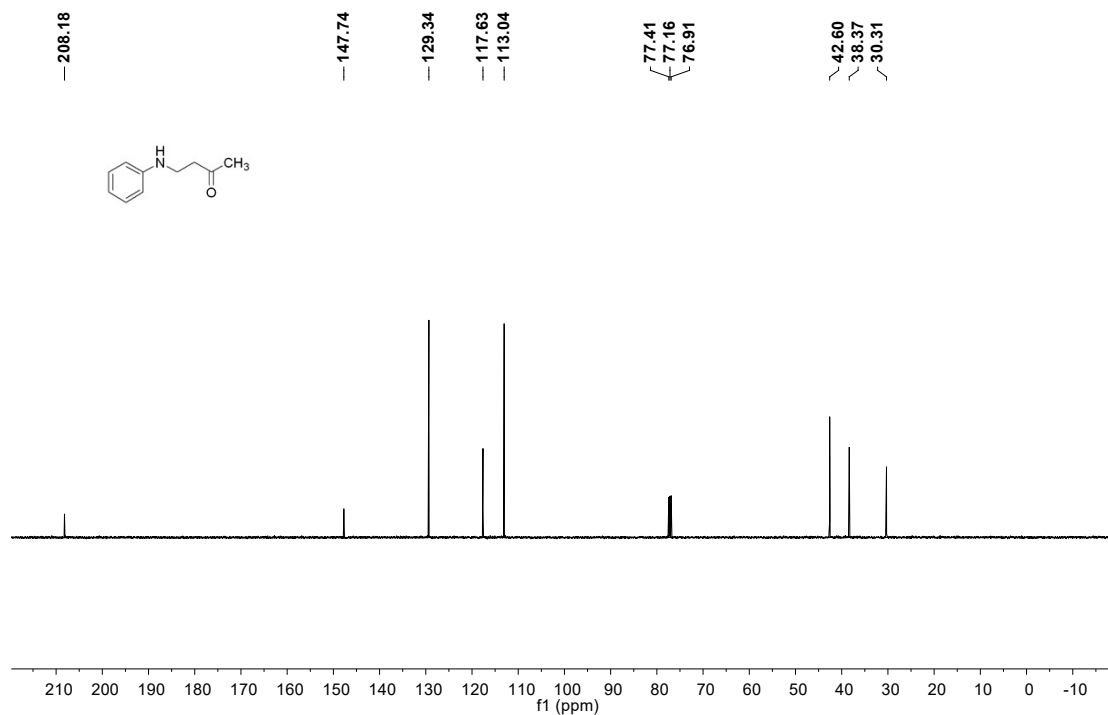

### Compound 3b-1H NMR(500 MHz,CDCl3)

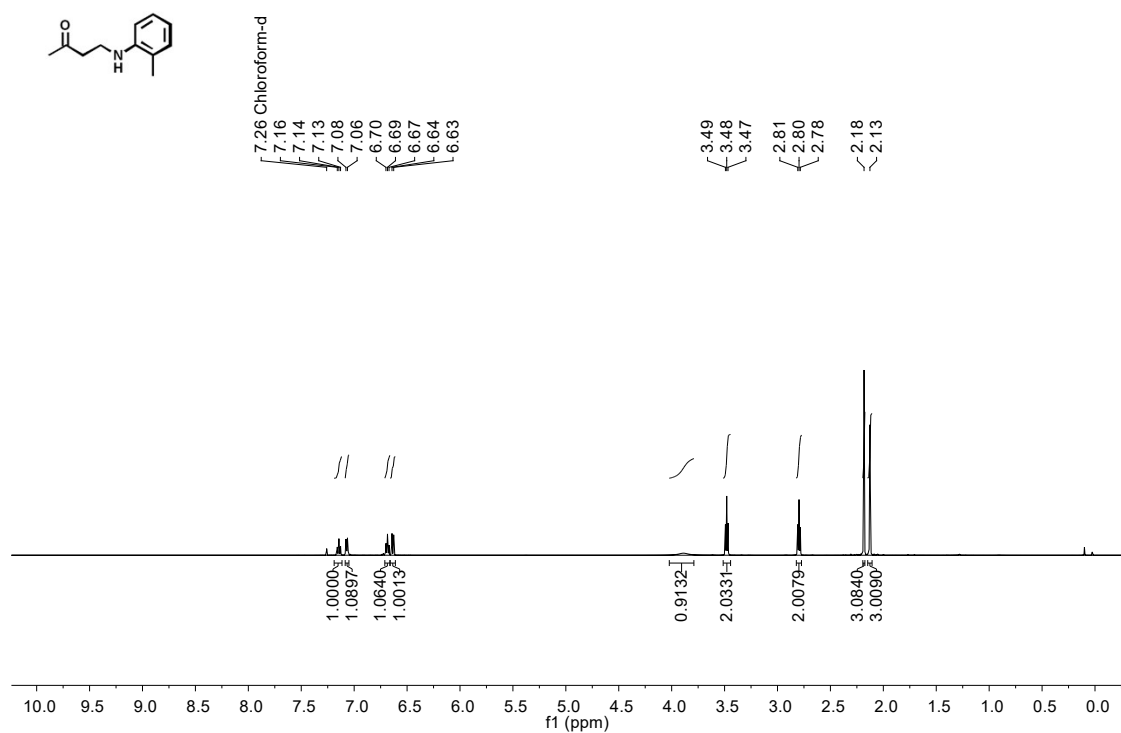

### Compound 3b-13C{1H} NMR(126MHz,CDCl3)

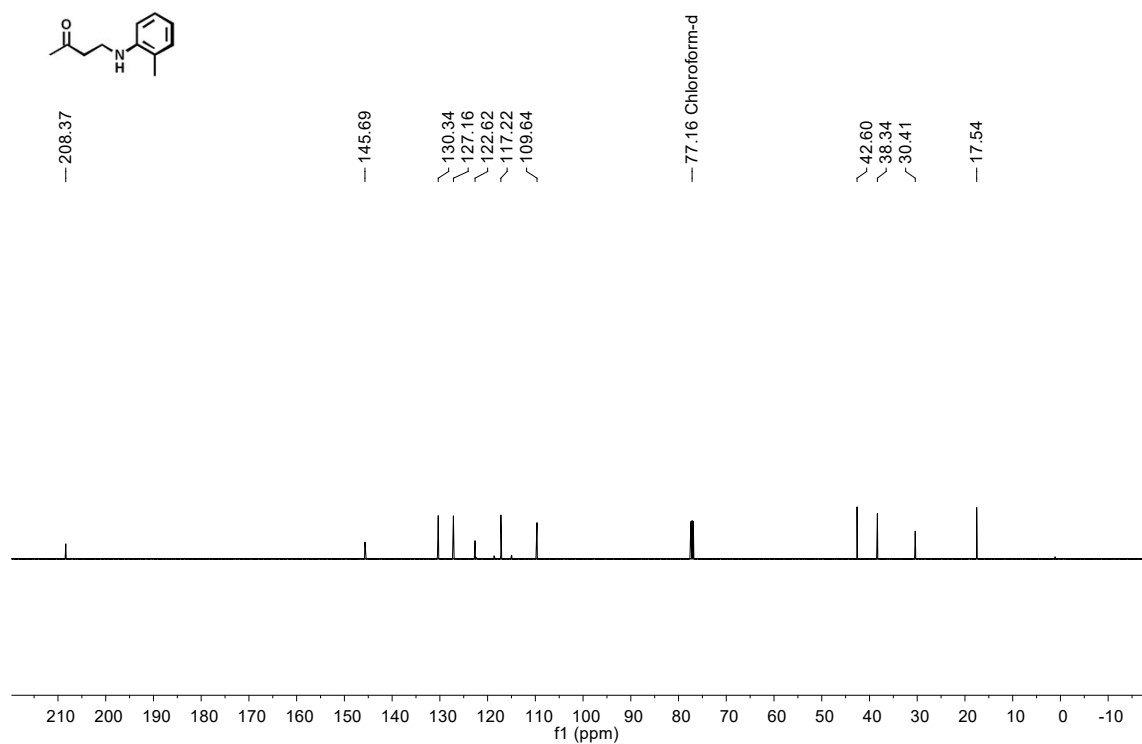



### Compound 3c-1H NMR(500 MHz,CDCl3)

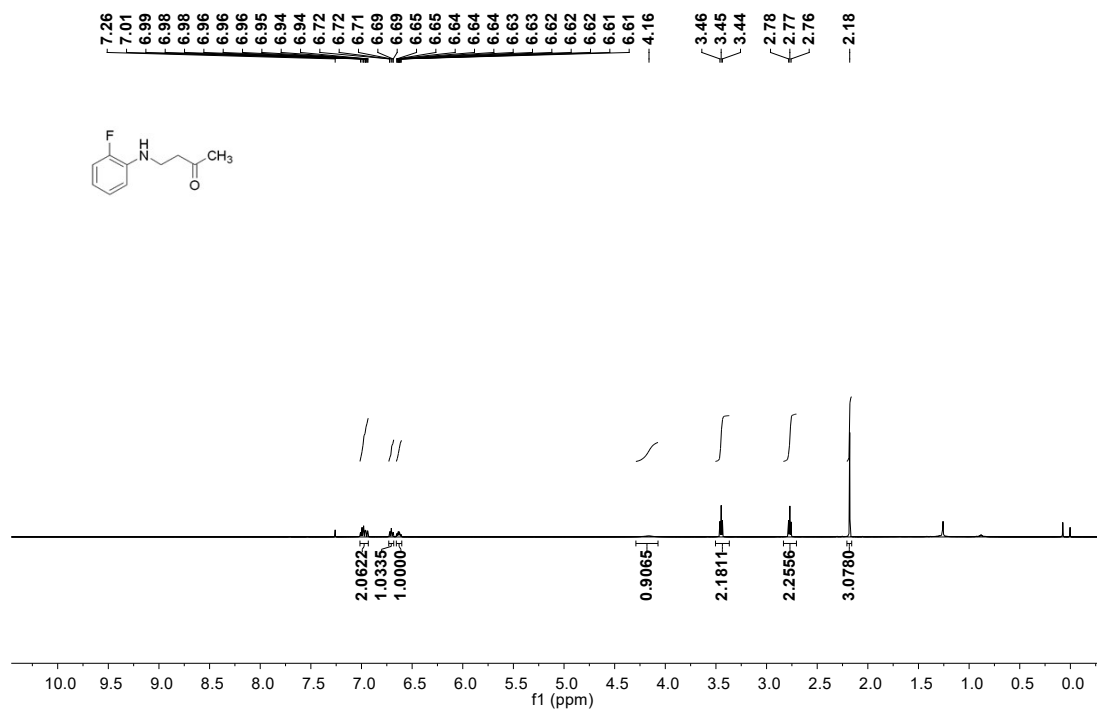

### Compound 3c-13C{1H} NMR(126MHz,CDCl3)

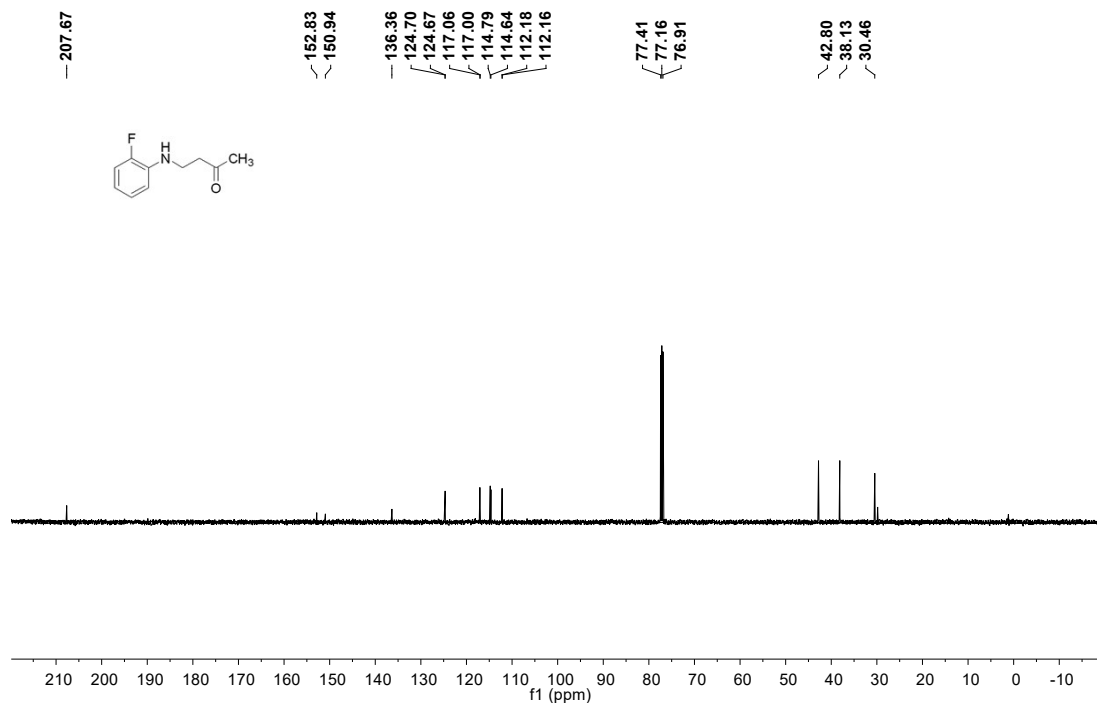

**Compound 3c-19F NMR(471 MHz,CDCl3)**

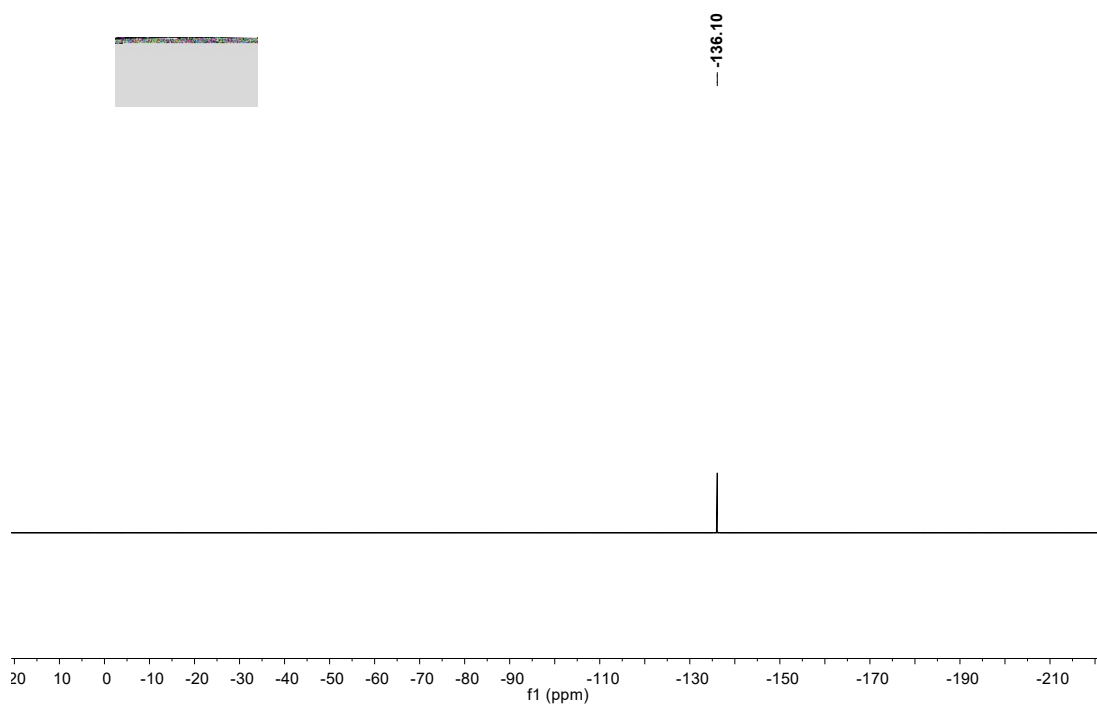

### Compound 3d-1H NMR(500 MHz,CDCI3)

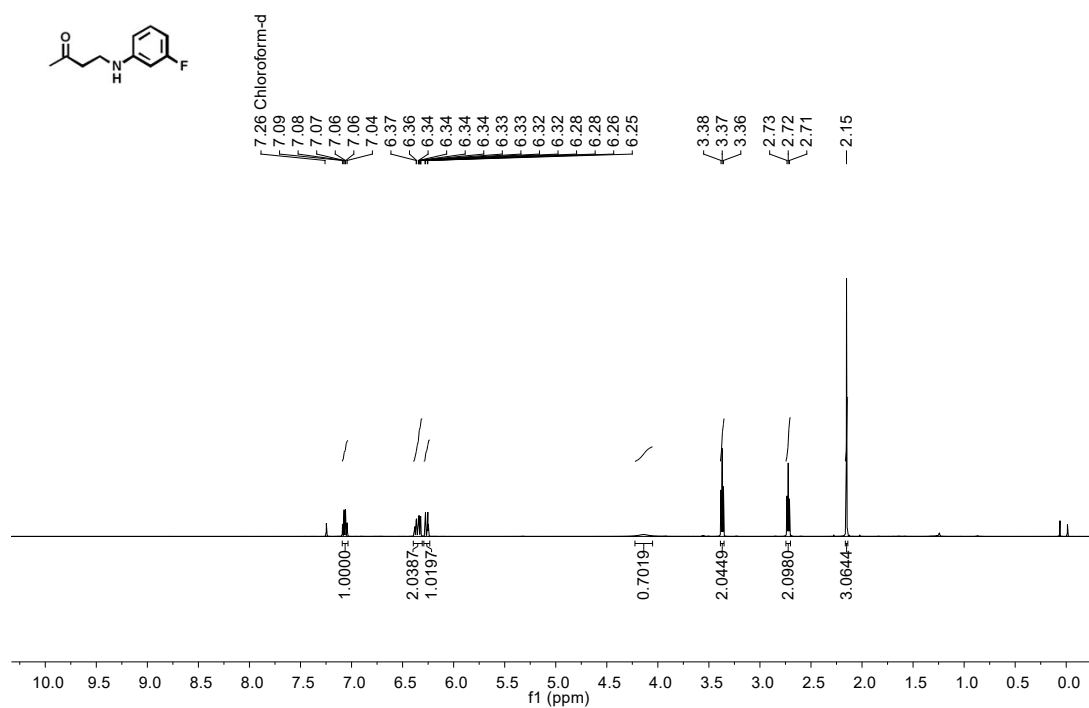

### Compound 3d-13C{1H} NMR(126MHz,CDCI3)

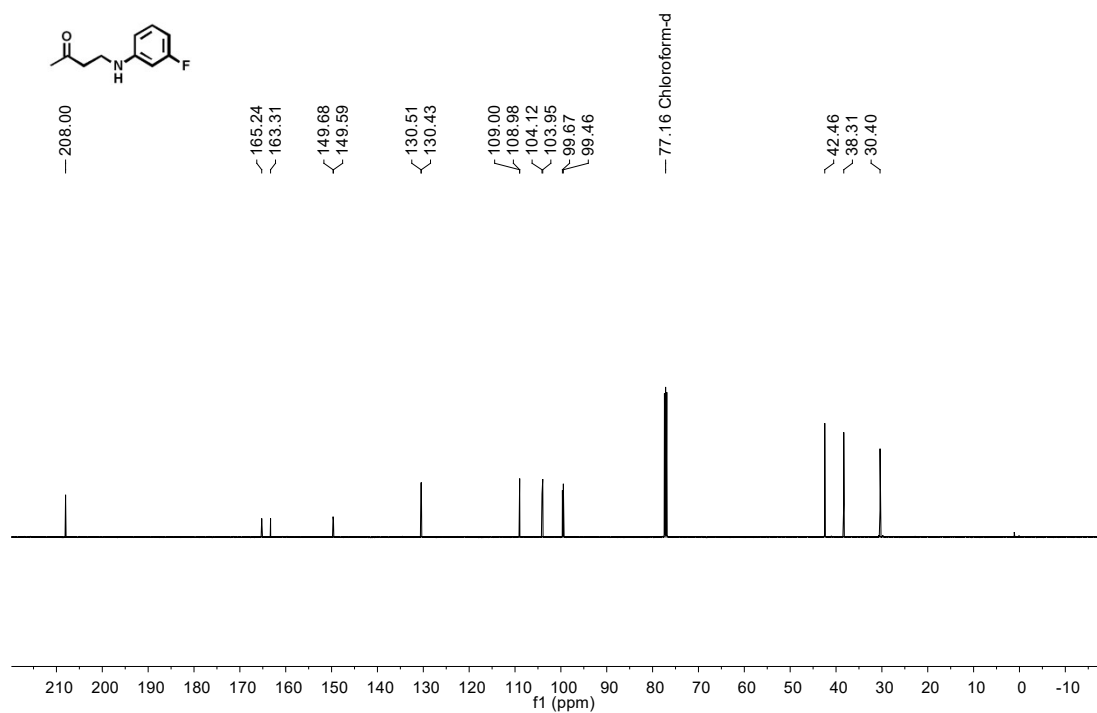

# Compound 3d-19F NMR(471 MHz,CDC13)

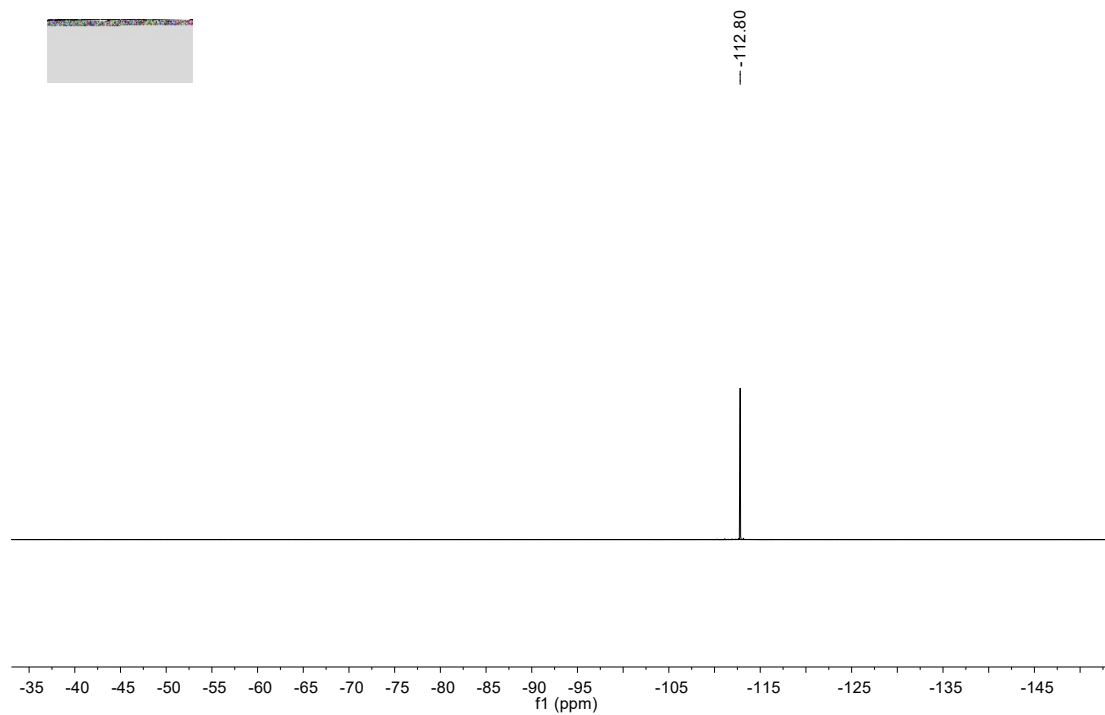

### Compound 3e-1H NMR(500 MHz,CDCl3)

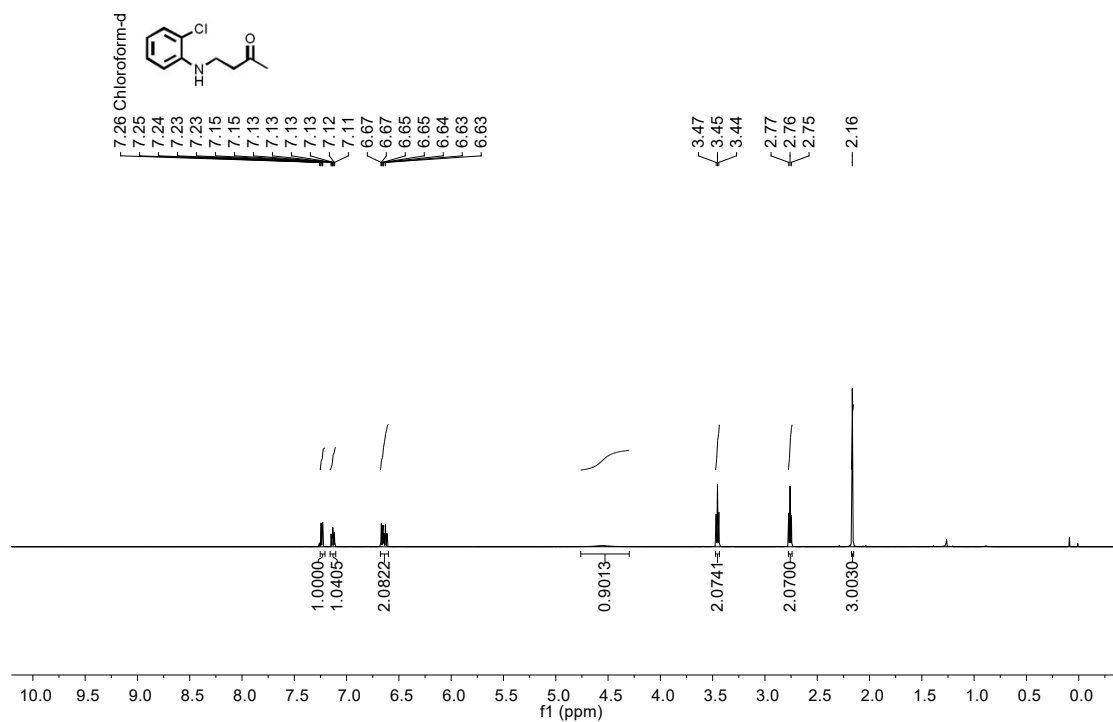

### Compound 3e-13C{1H} NMR(126MHz,CDCl3)

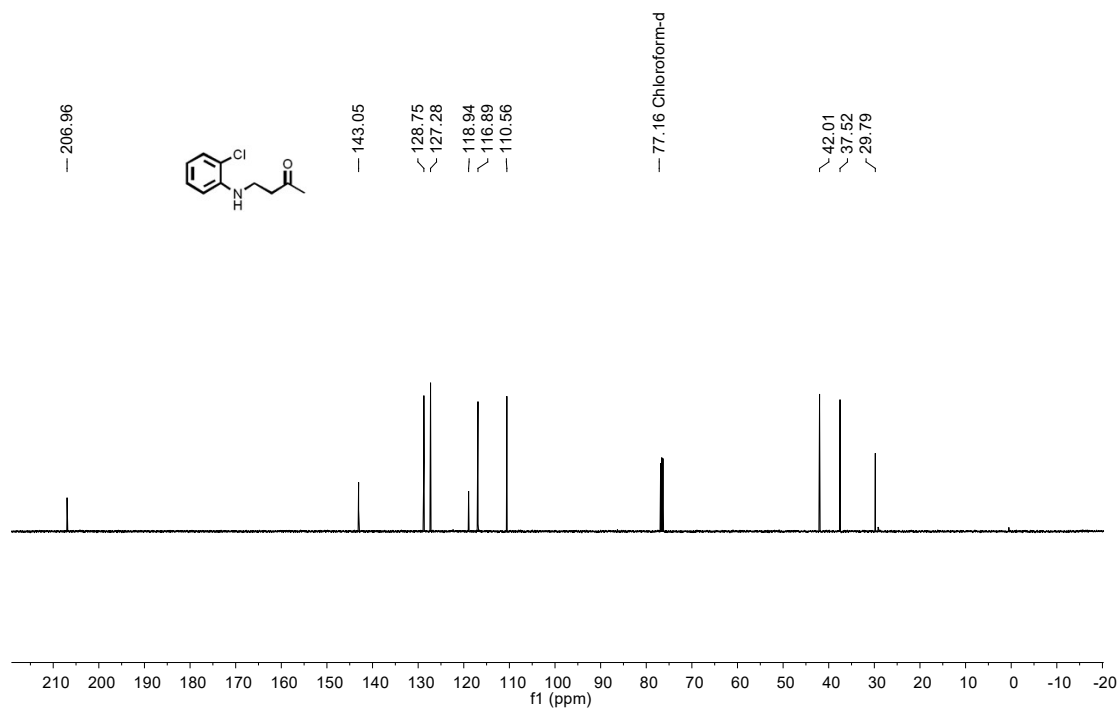

### Compound 3f-1H NMR(500 MHz,CDCI3)

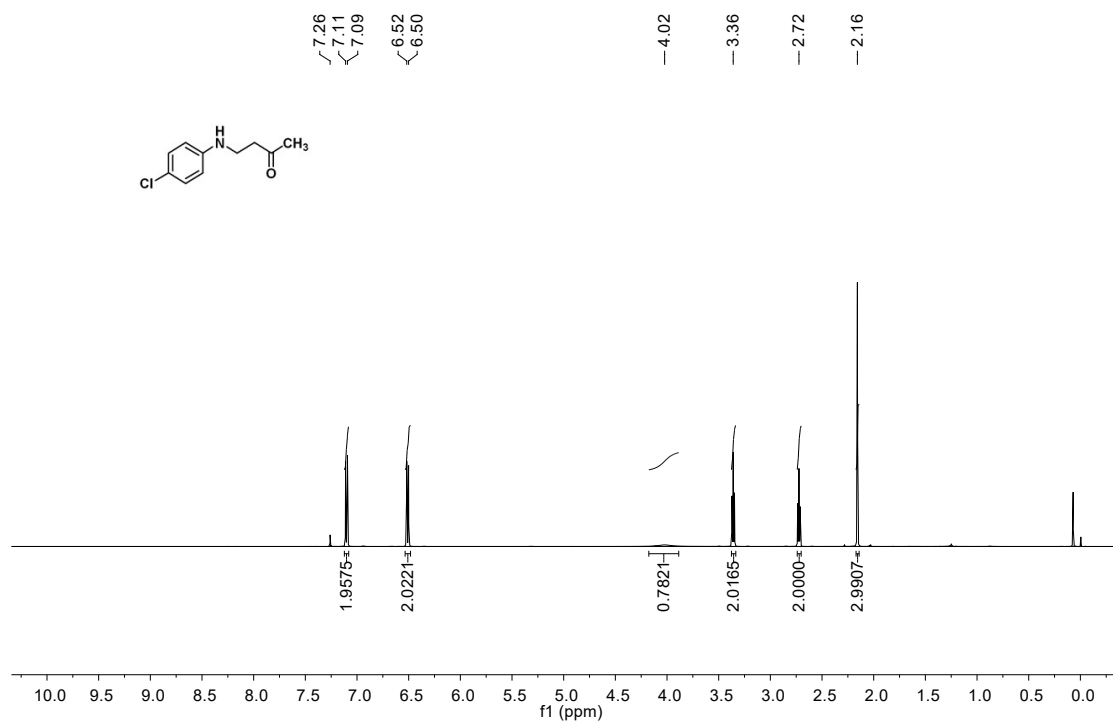

### Compound 3f-13C{1H} NMR(126MHz,CDCI3)

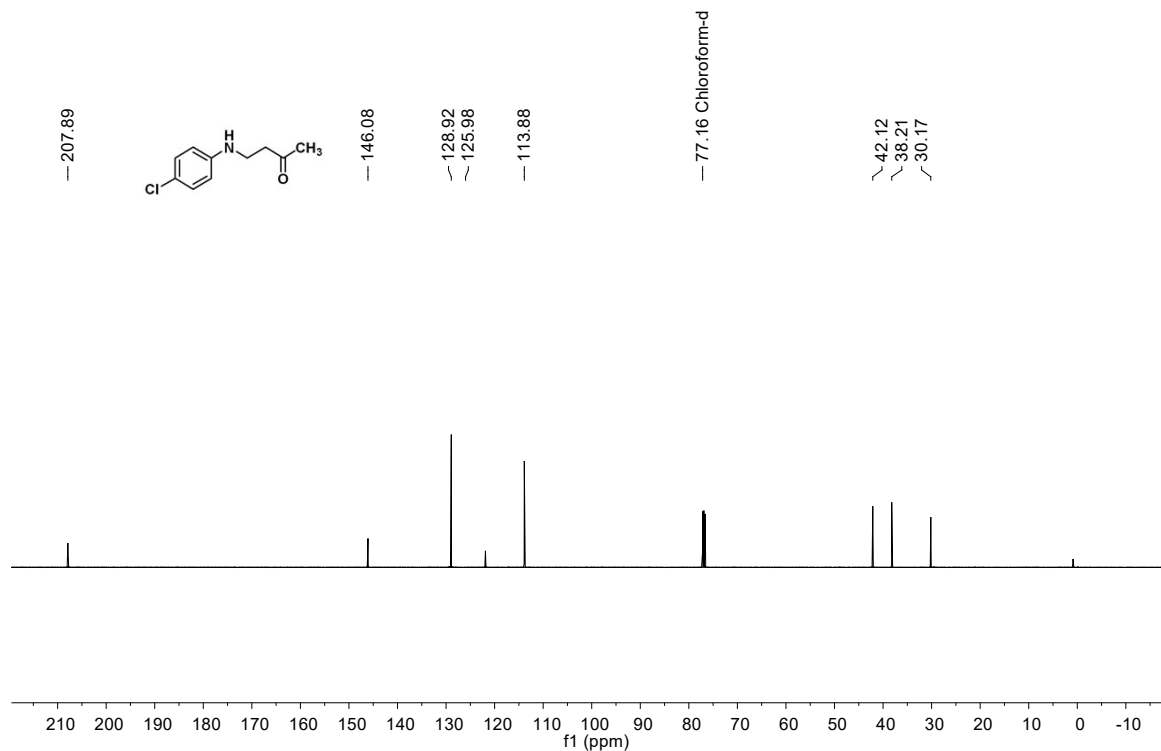

### Compound 3g-1H NMR(500 MHz,CDCl3)

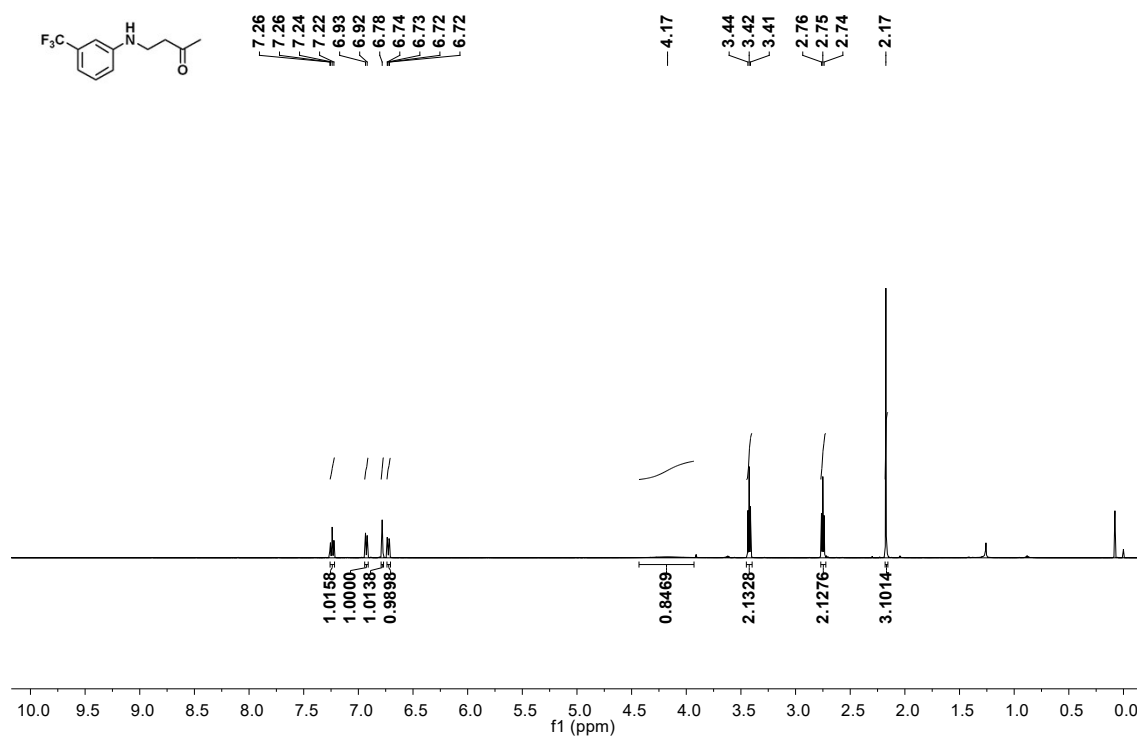

### Compound 3g-13C{1H} NMR(126MHz,CDCl3)

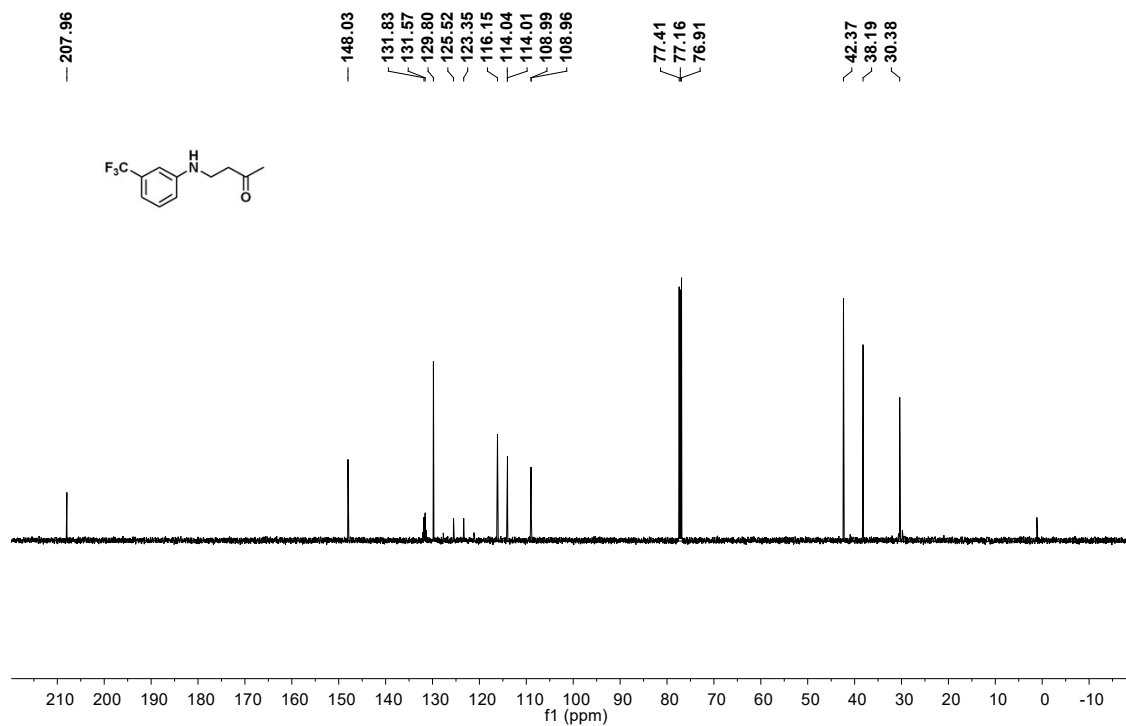

**Compound 3g-19F NMR(471 MHz,CDCI3)**

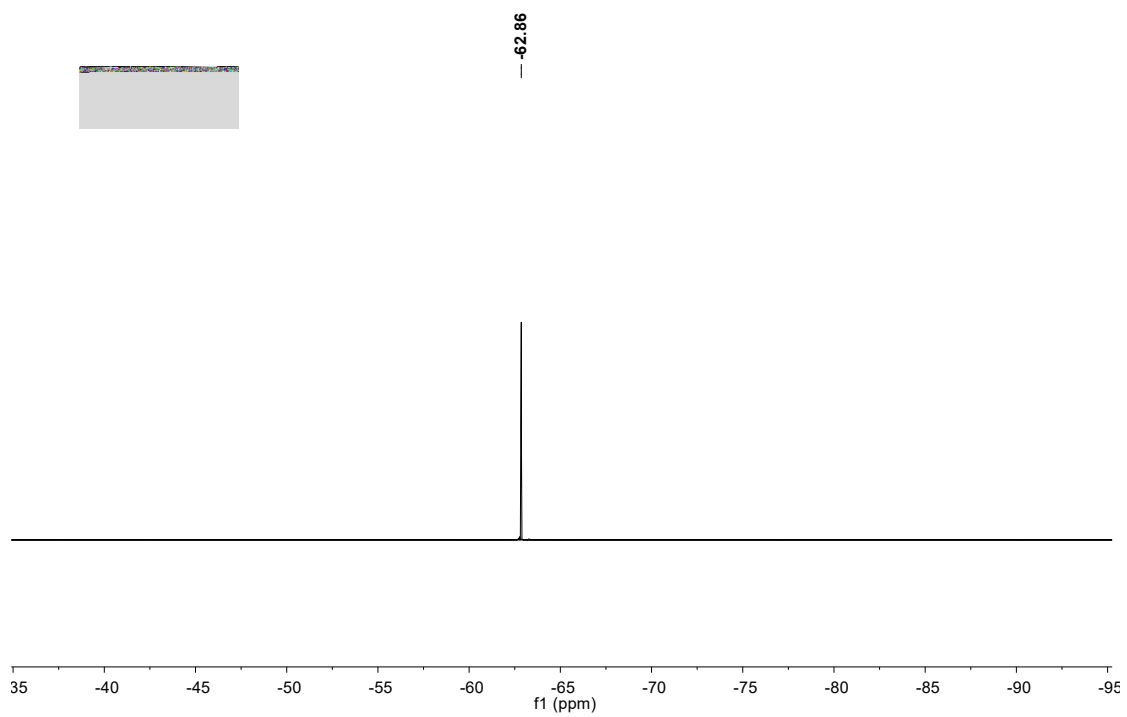



### Compound 3h-1H NMR(500 MHz,CDCl3)

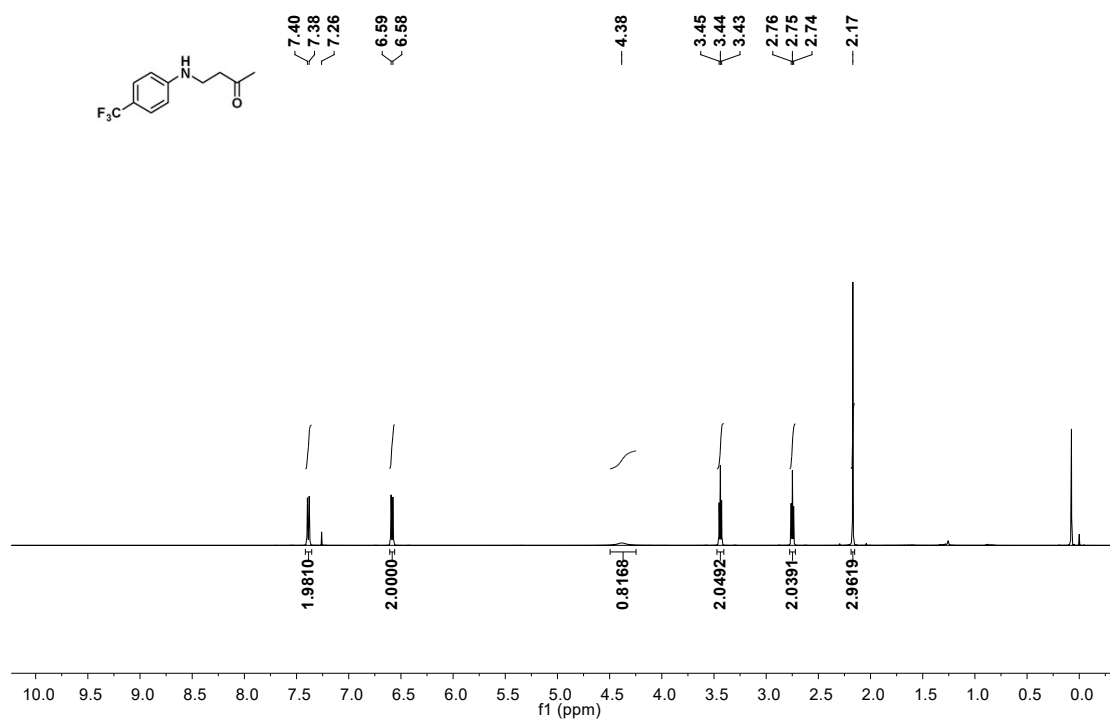

### Compound 3h-13C{1H} NMR(126MHz,CDCl3)

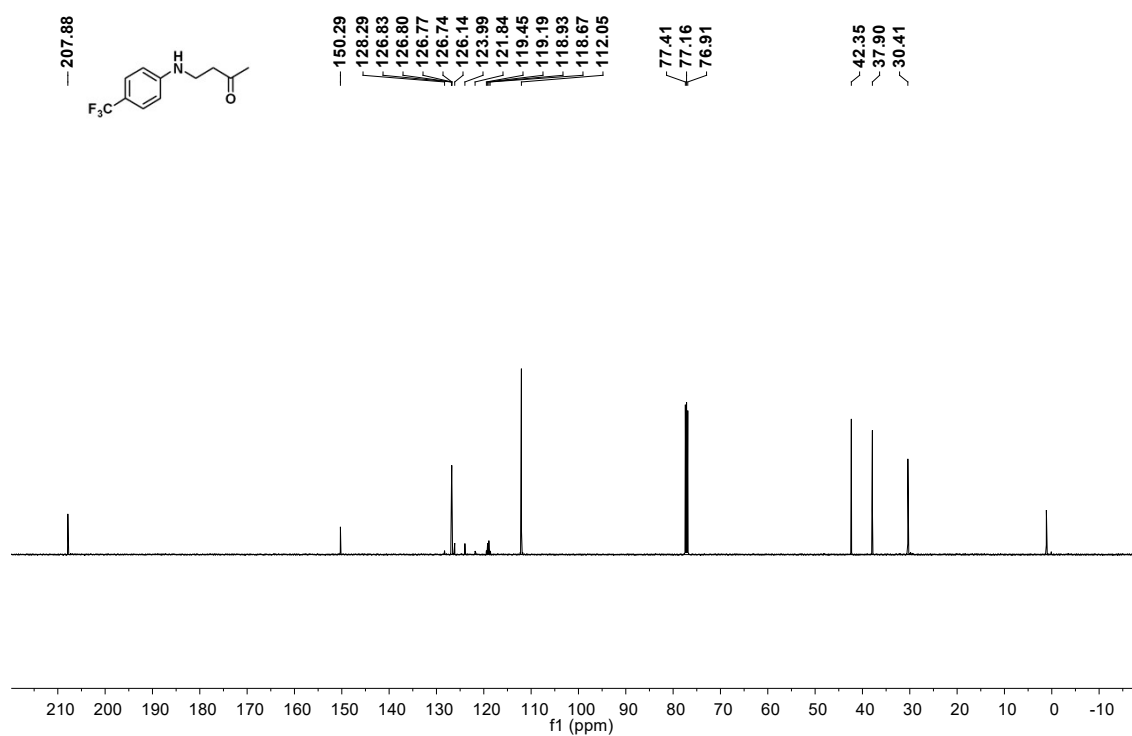

**Compound 3h-19F NMR(471 MHz,CDCl3)**

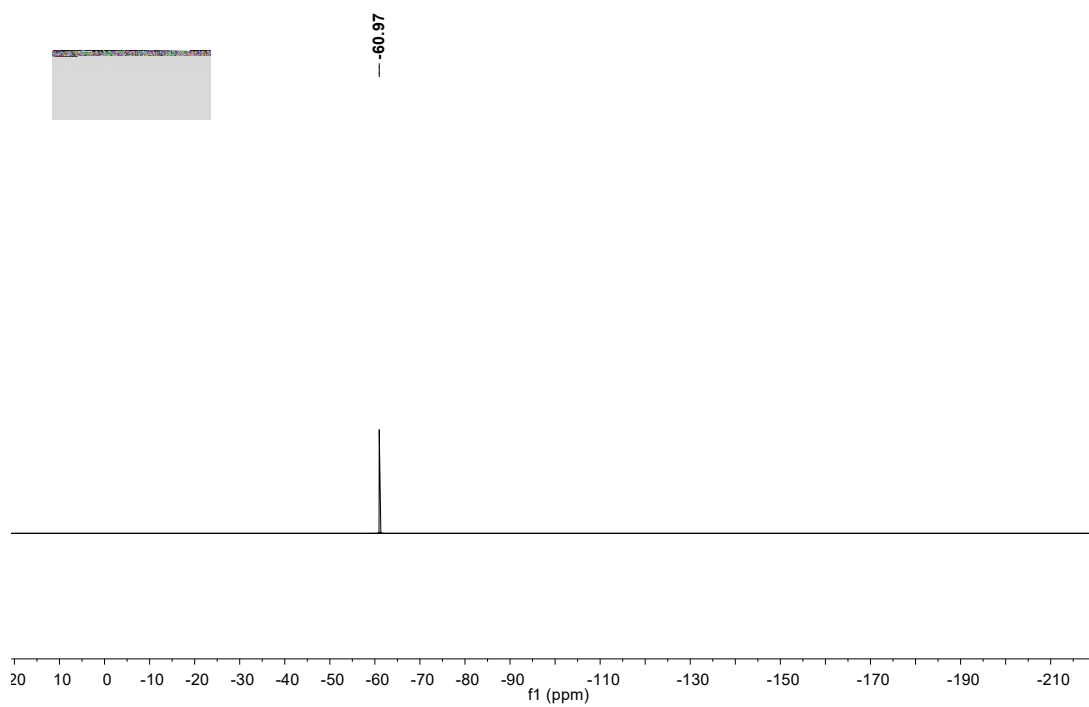

### Compound 3i-1H NMR(500 MHz,CDCI3)

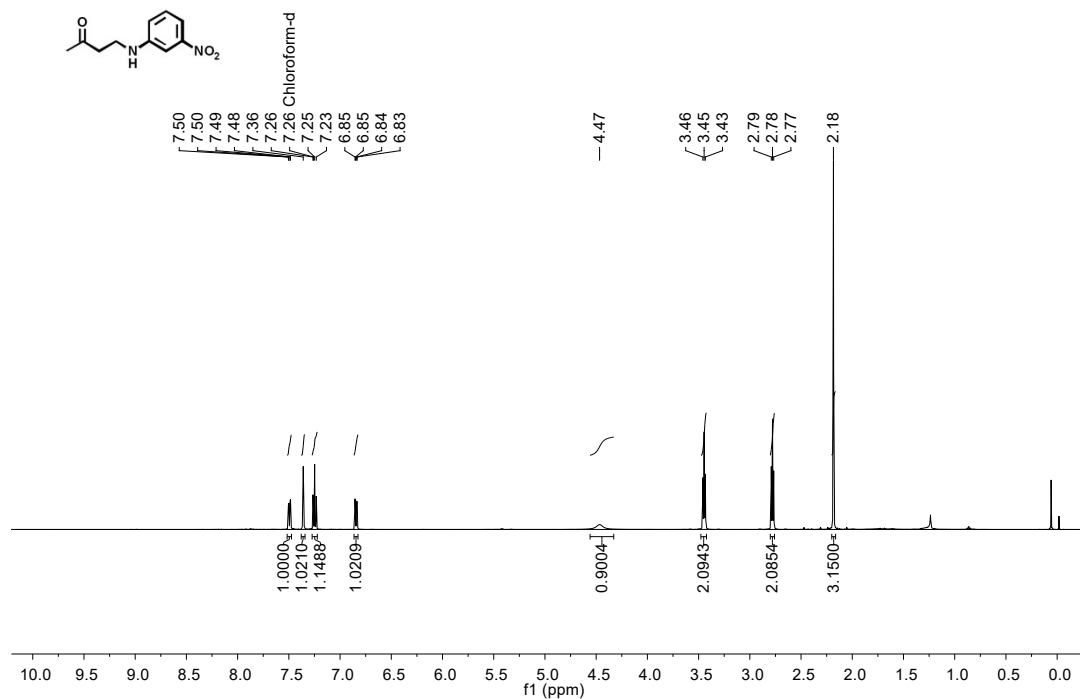

### Compound 3i-13C{1H} NMR(126MHz,CDCI3)

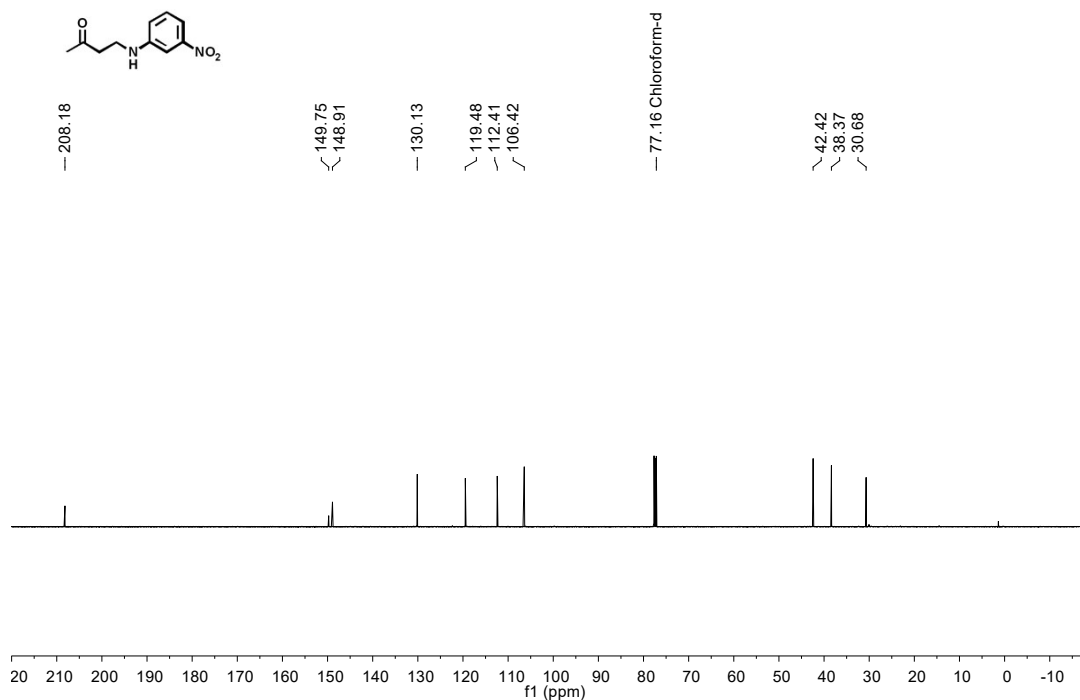

### Compound 3j-1H NMR(500 MHz,CDCI3)

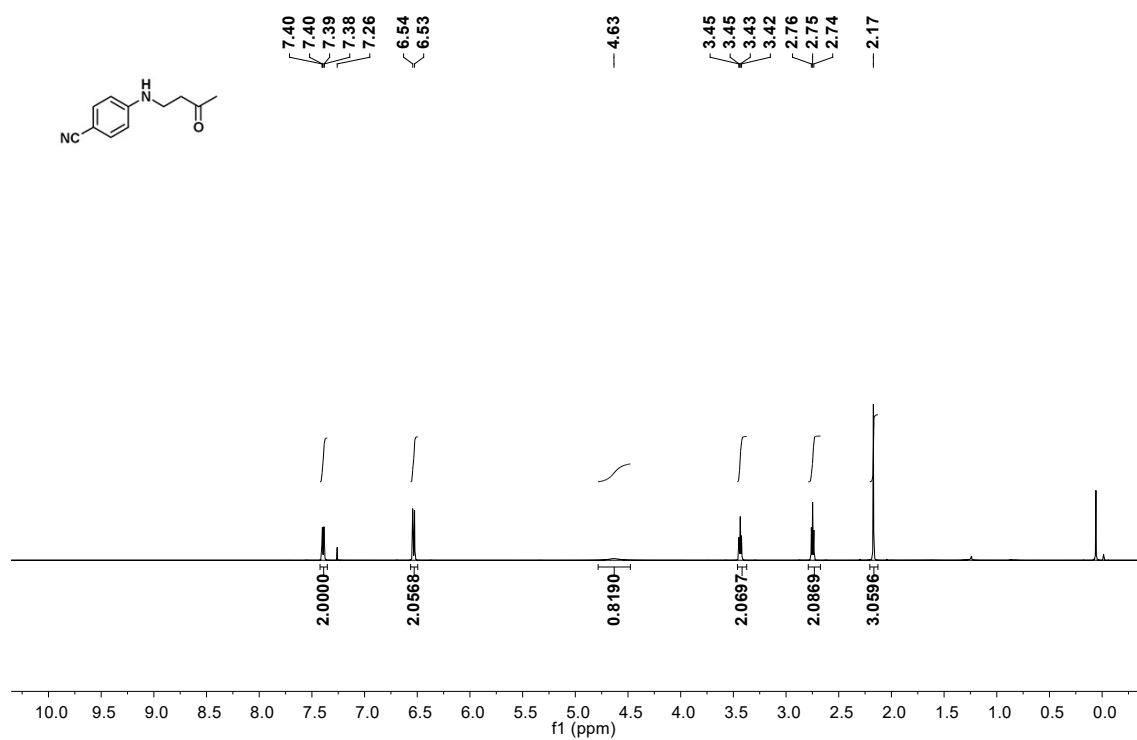

### Compound 3j-13C{1H} NMR(126MHz,CDCI3)

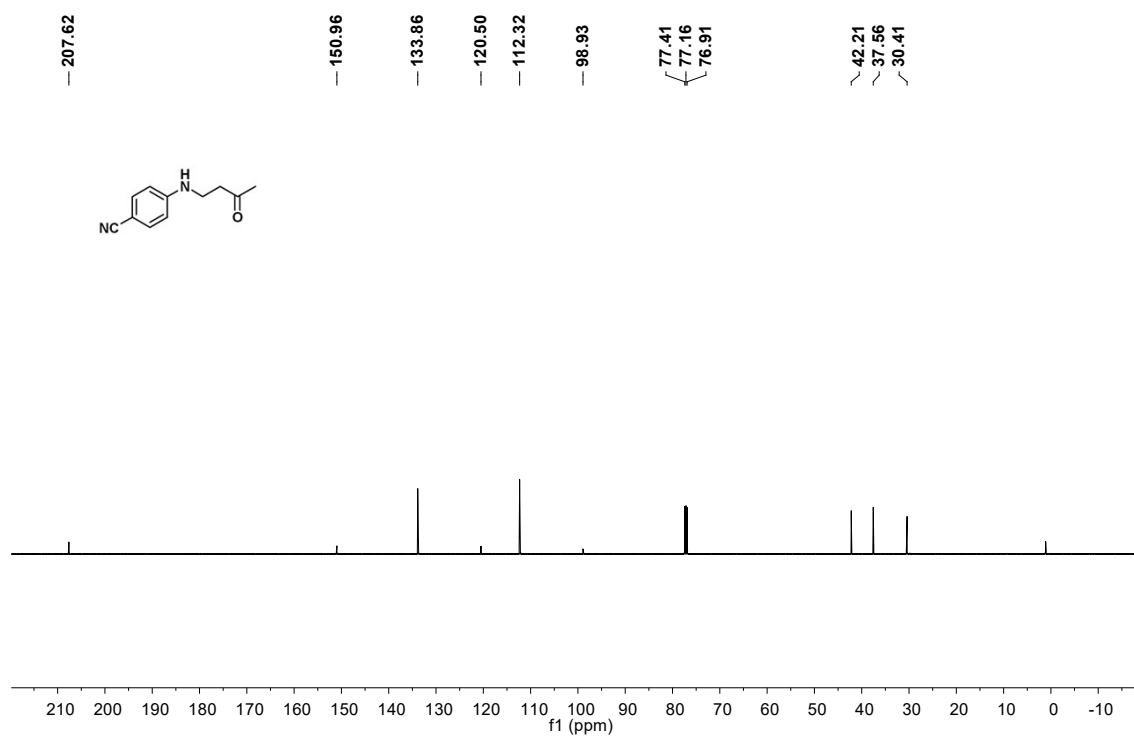

### Compound 3k-1H NMR(500 MHz,CDC13)

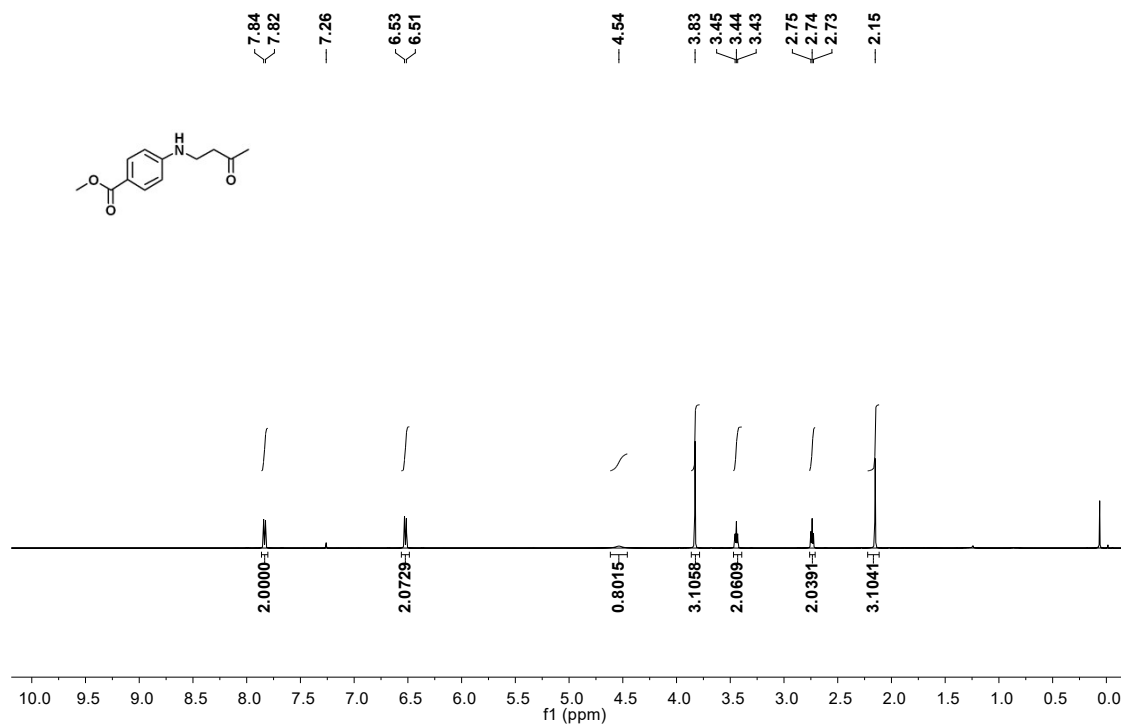

### Compound 3k-13C{1H} NMR(126 MHz,CDC13)

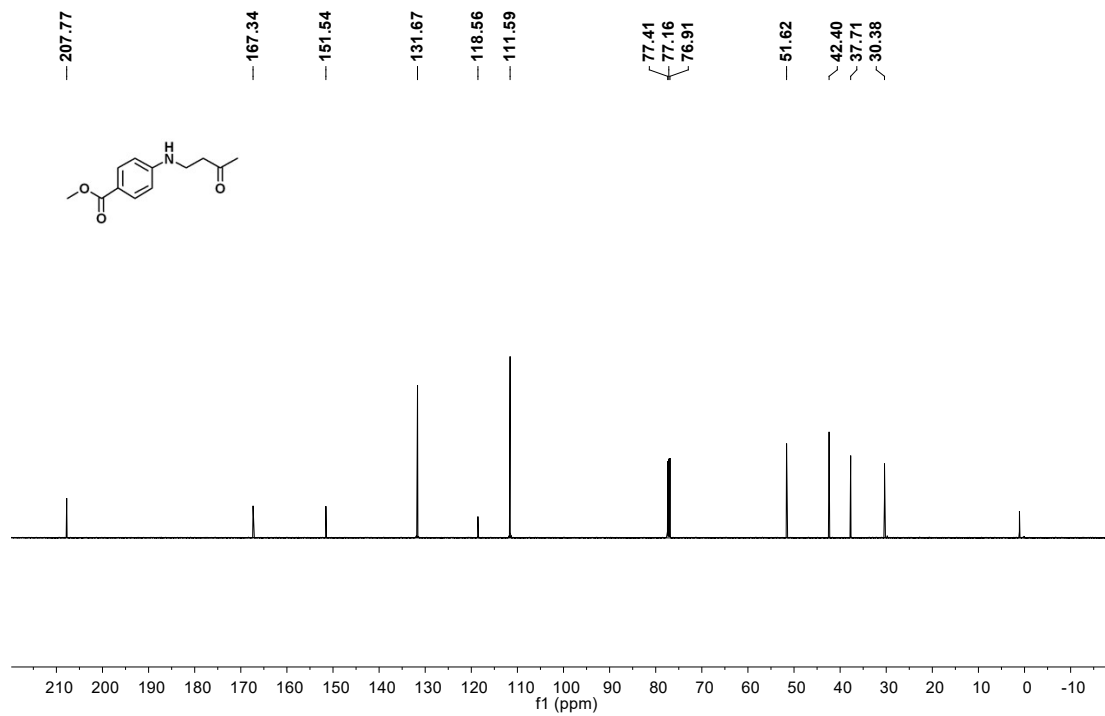

### Compound 3l-1H NMR(500 MHz,CDC13)

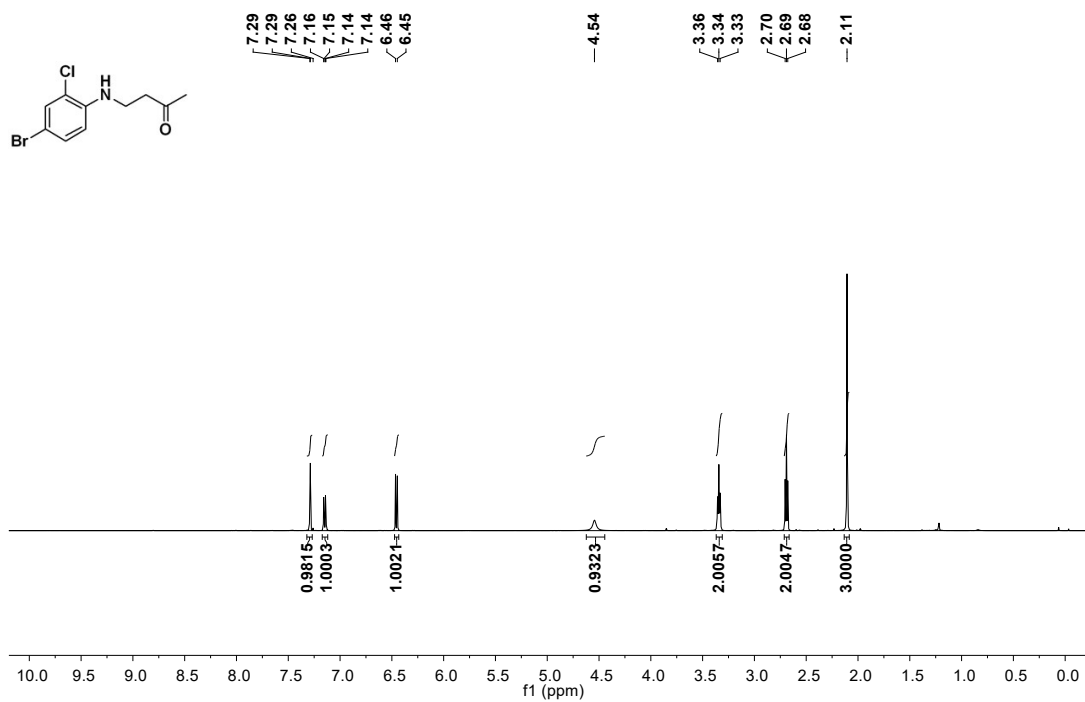

### Compound 3l-13C{1H} NMR(126MHz,CDC13)

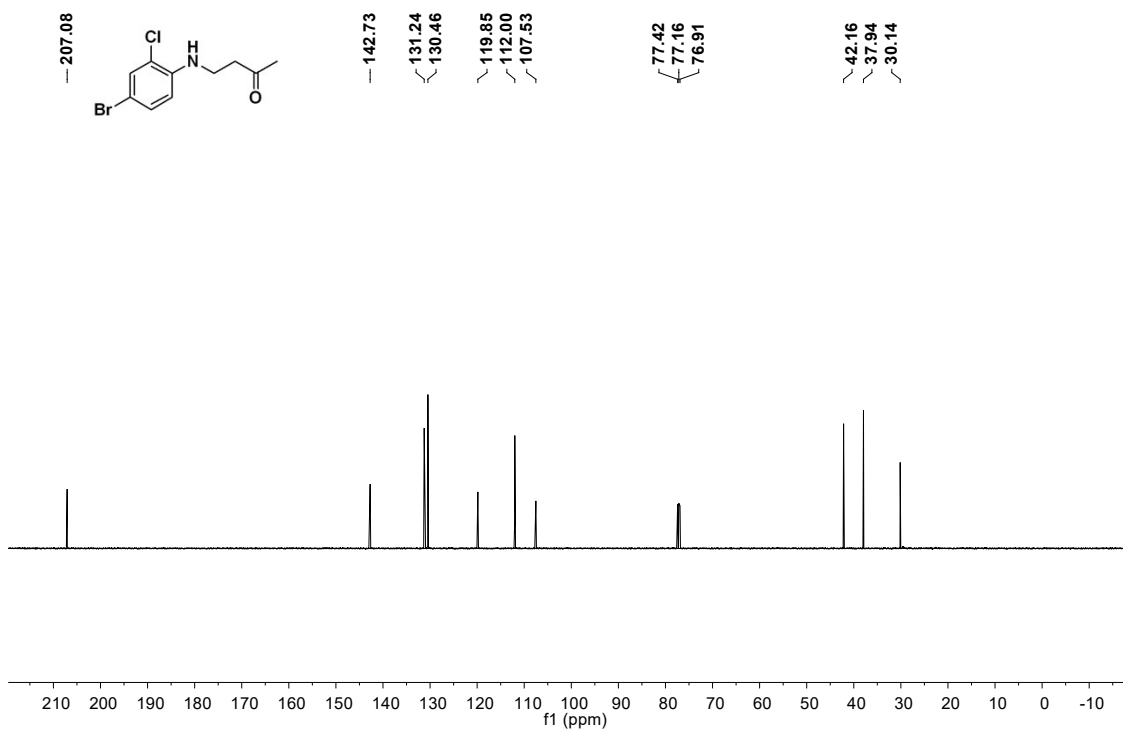

### Compound 3m-1H NMR(500 MHz,CDCl3)

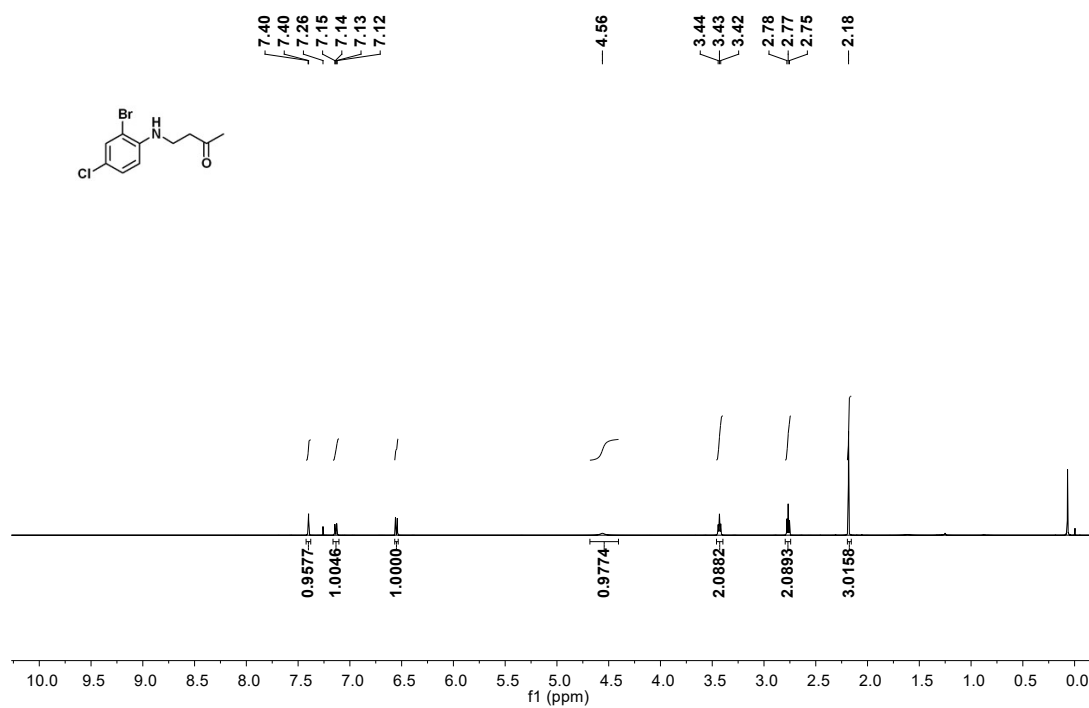

### Compound 3m-13C{1H} NMR(124 MHz,CDCl3)

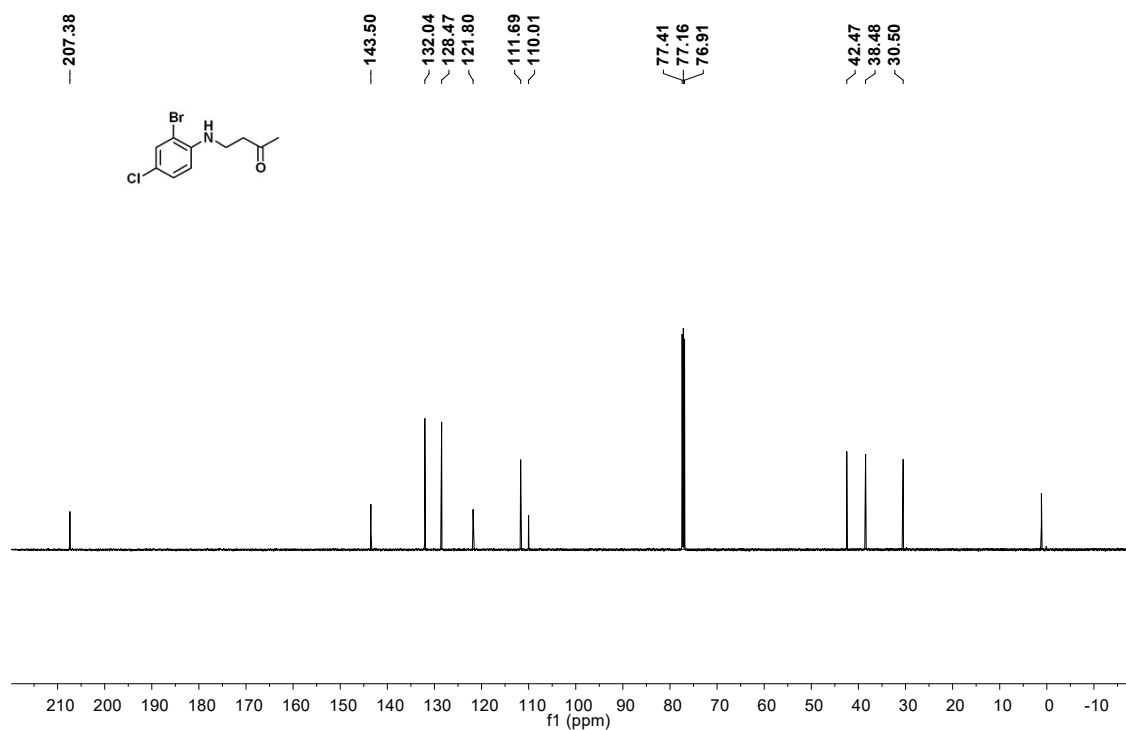

### Compound 3n-1H NMR(500MHz,CDCl3)

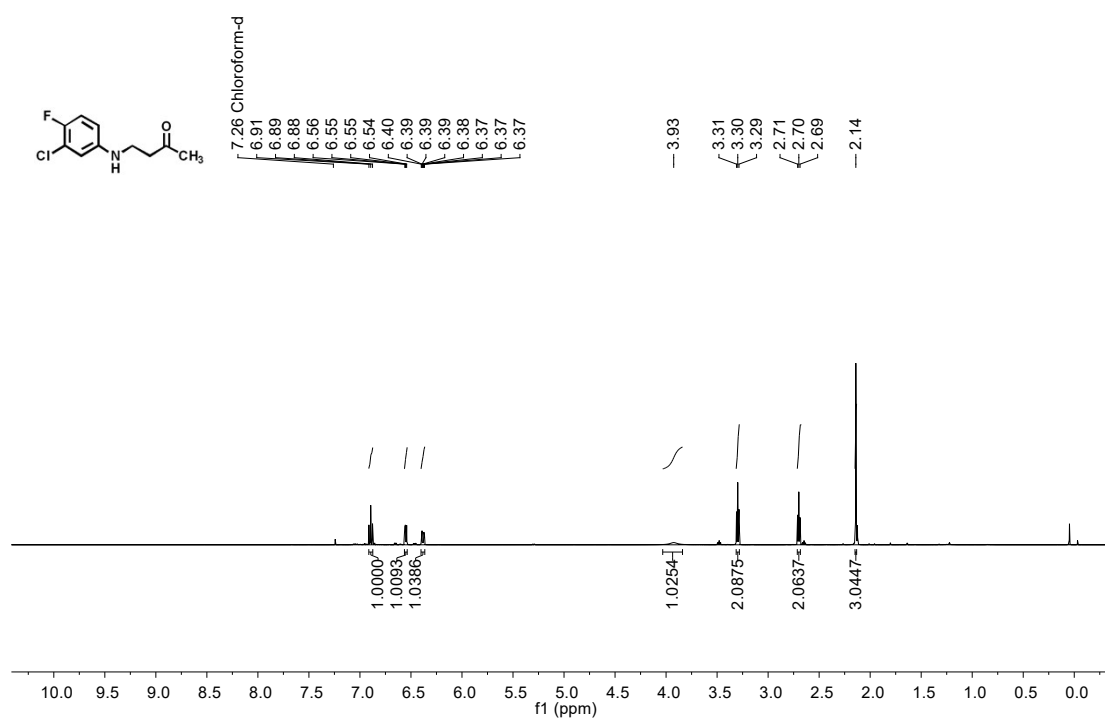

### Compound 3n-13C{1H} NMR(126MHz,CDCl3)

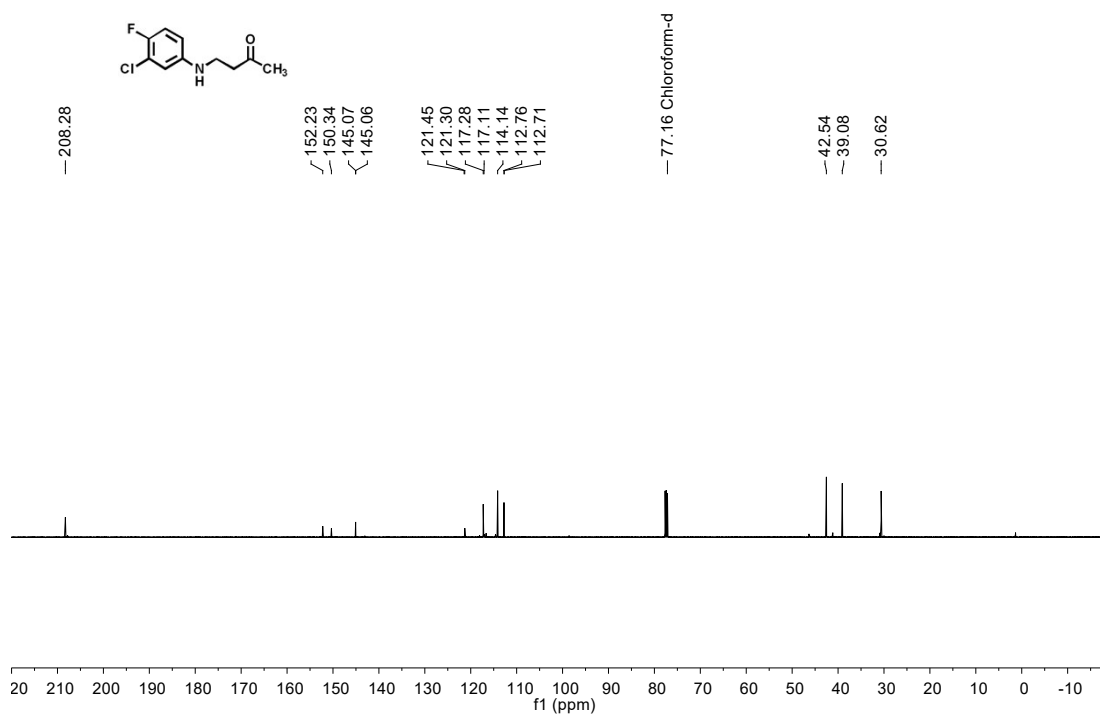



### Compound 3o-1H NMR(500 MHz,CDCI3)

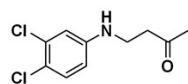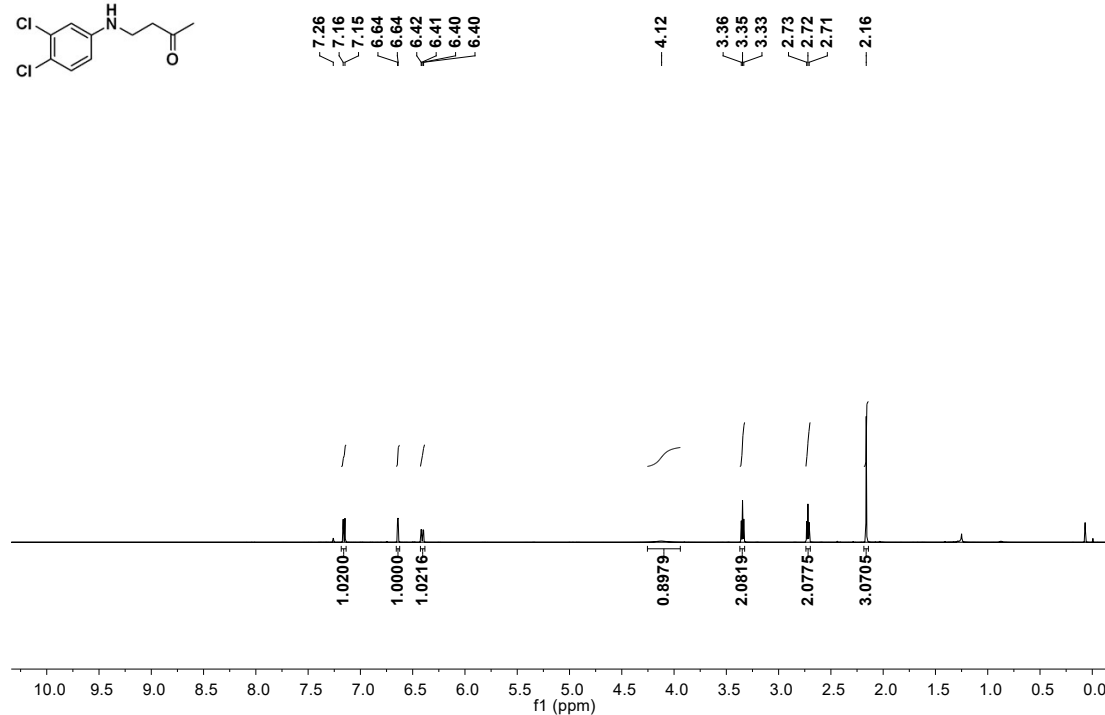

### Compound 3o-13C{1H} NMR(126MHz,CDCI3)

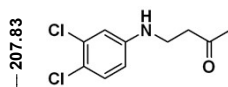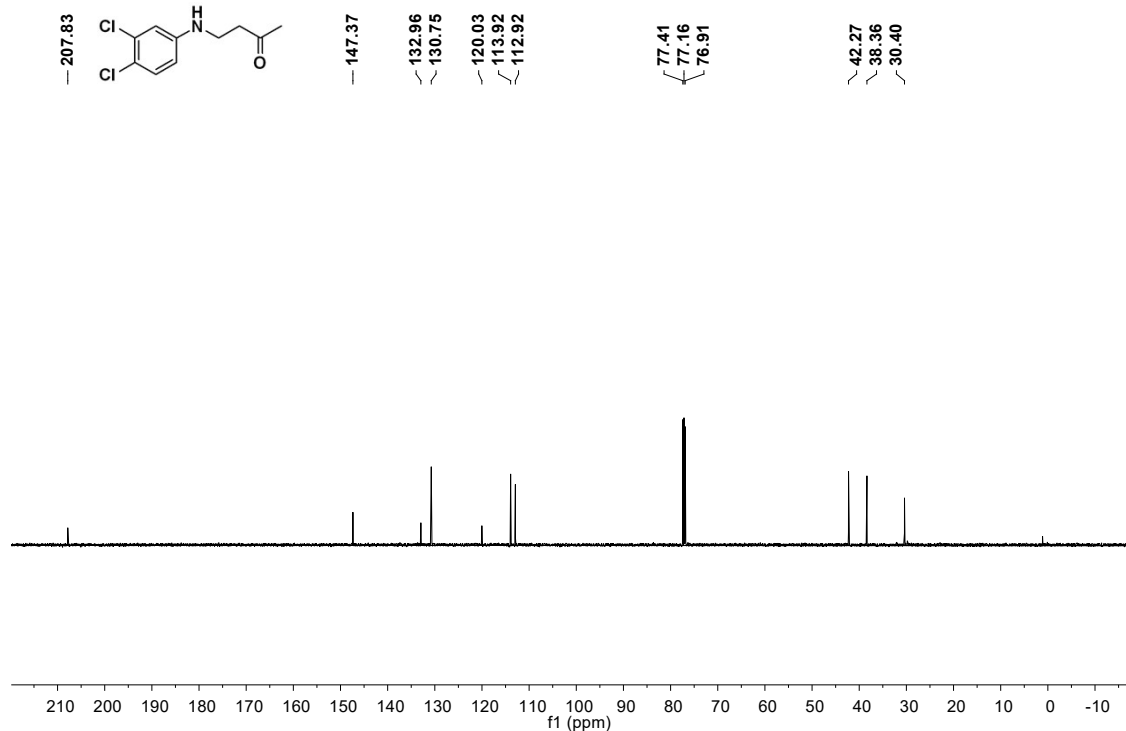

### Compound 3p-1H NMR(500 MHz,CDCI3)

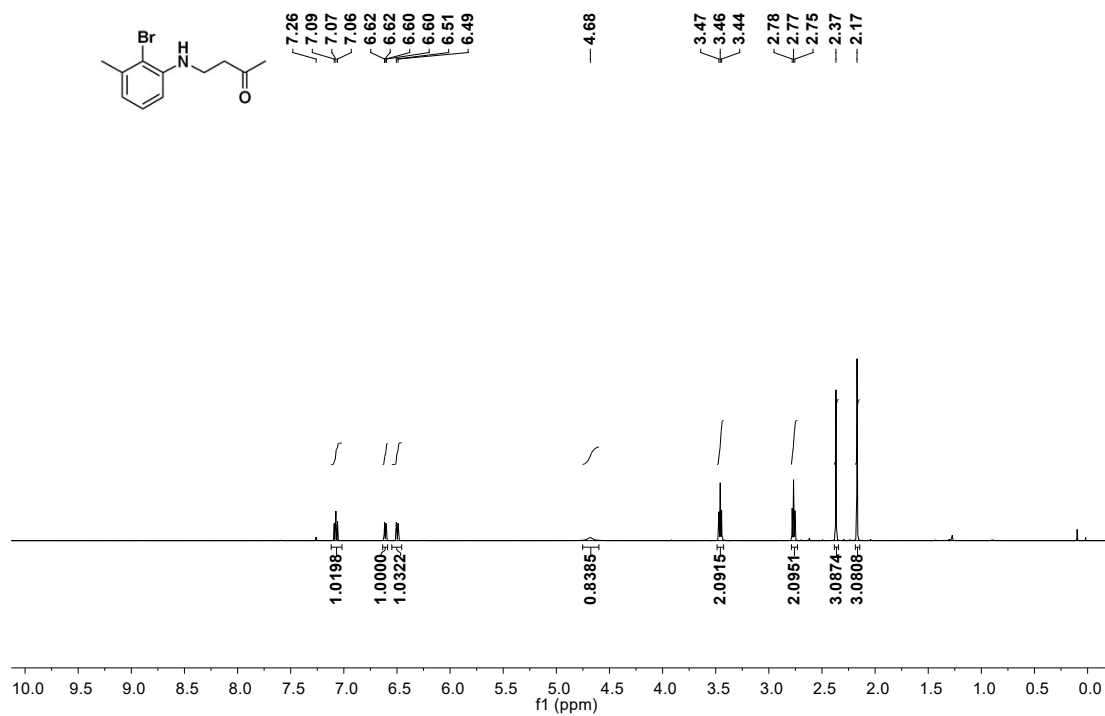

### Compound 3p-13C{1H} NMR(126MHz,CDCI3)

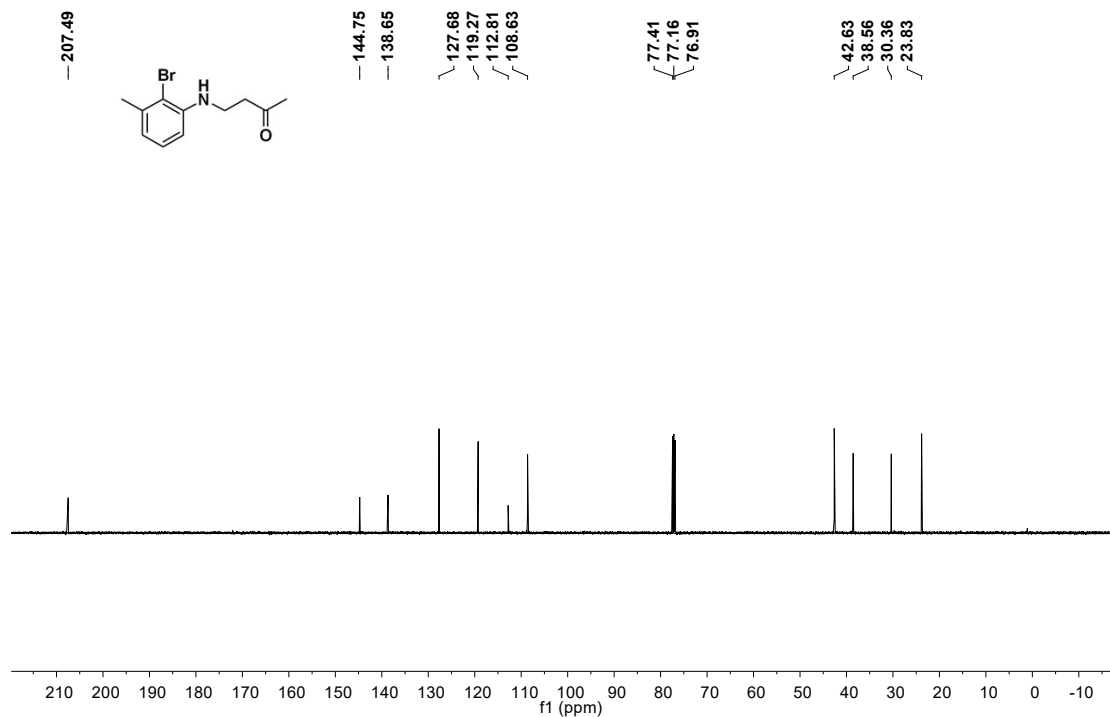

### Compound 3q-1H NMR(500MHz,CDCl3)

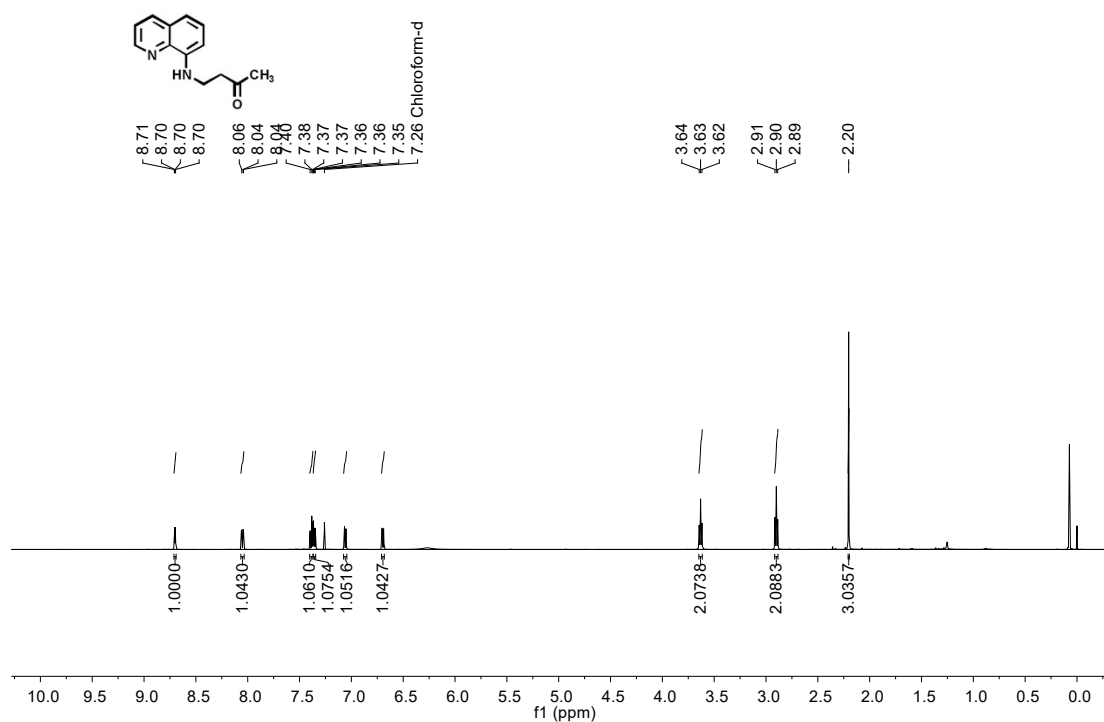

### Compound 3q-13C{1H} NMR(126MHz,CDCl3)

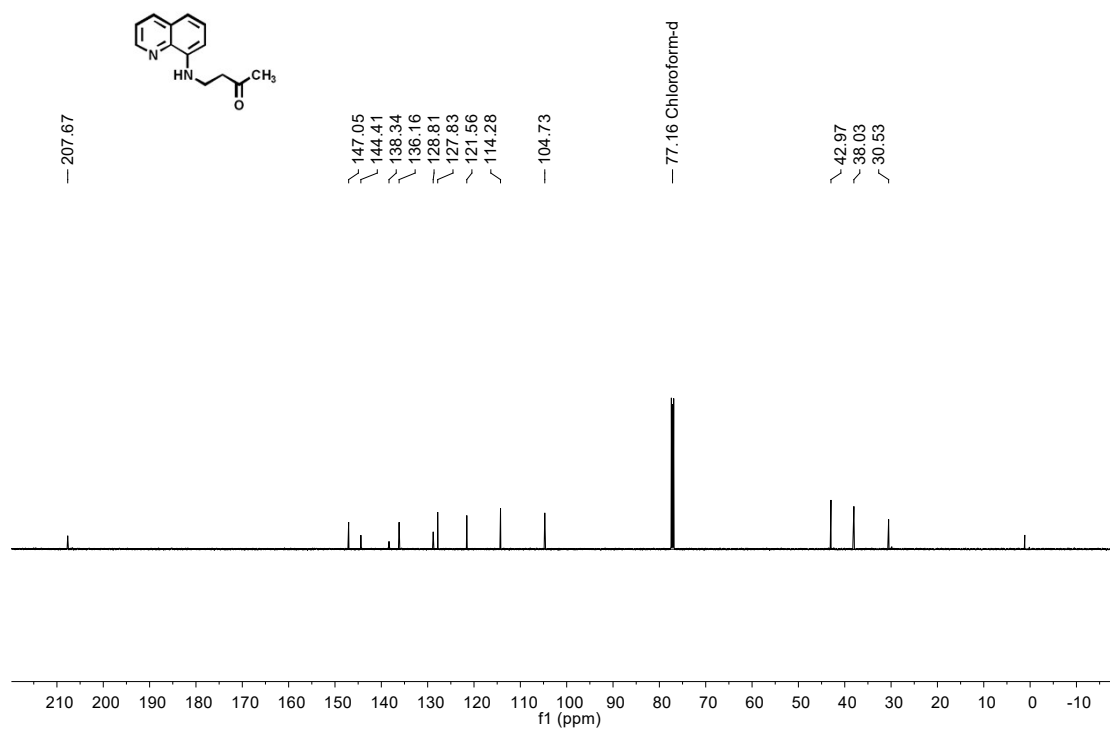

### Compound 3r-1H NMR(500MHz,CDCl3)

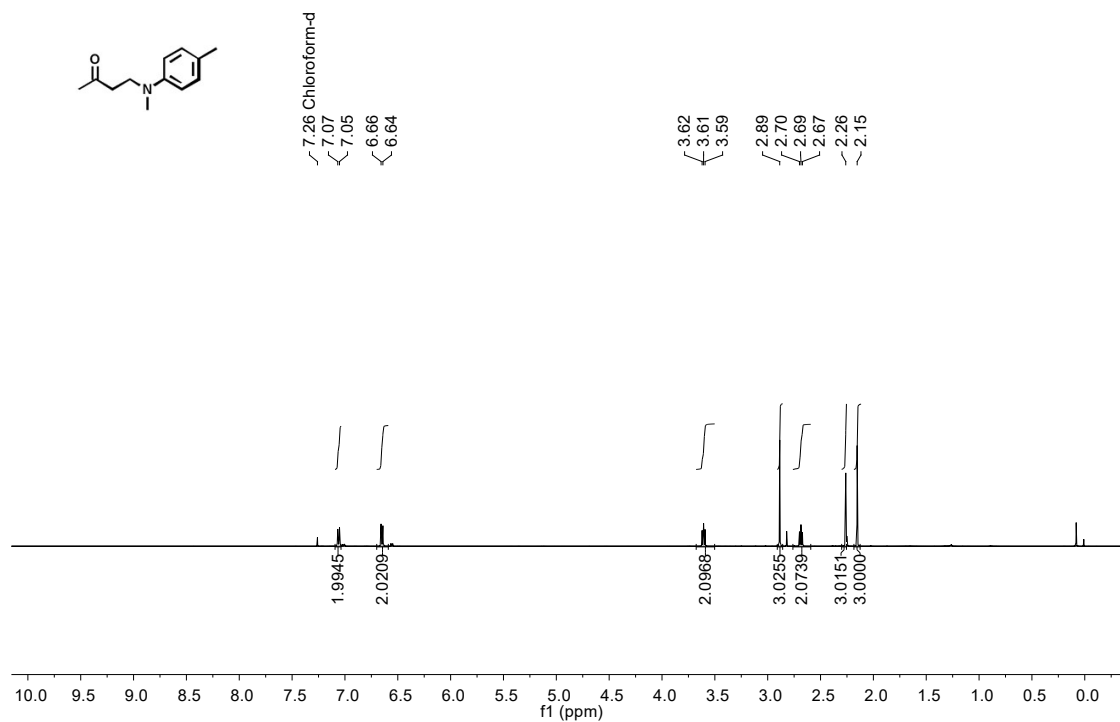

### Compound 3r-13C{1H} NMR(126MHz,CDCl3)

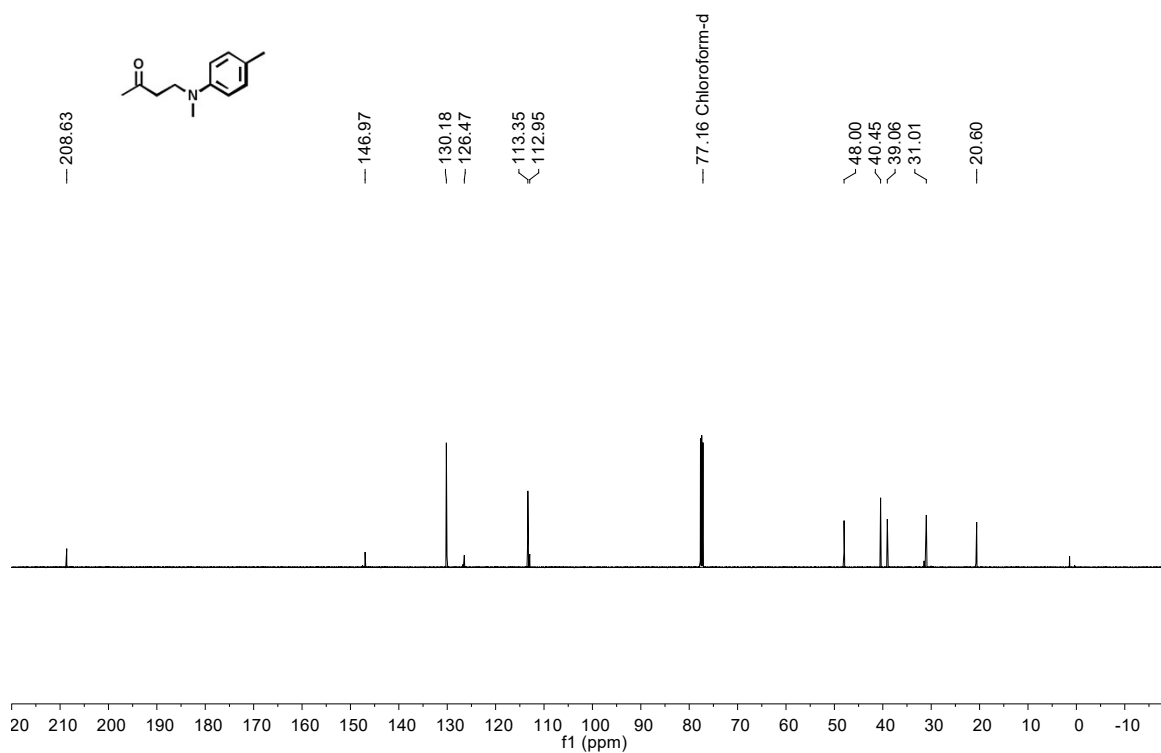

Supplement: d4ra01339e1.pdf [file d4ra01339e1.pdf]
